# Supplementary material for: De novo assembly and comparative transcriptome characterization of Poecilobdella javanica provide insight into blood feeding of medicinal leeches
Source: Royal Society of Chemistry journal article supplement (doi:10.1039/c8mo00098k), 2018-09-13
Supplement: c8mo00098k2.xlsx [file c8mo00098k2.xlsx]

## Sheet: Supple_Table_S1
Supplemental Table S1. BUSCO single-copy orthologs in Leech transcriptome assemblies.
Sequence	Score	Length	OG_Unique_IDs	Ortho_DB_Unique_Genes	Uniprot_Accessions	Gene_Symbols	ENSEMBL_Genes	Gene_Descriptions
scaffold7775	3647.9	1996	EOG0937004M	9606:00346b	Q6P2Q9	PRPF8	ENSG00000174231	220 kDa U5 snRNP-specific protein
scaffold7775	3647.9	1996	EOG0937004M	9606:004fd6	Q6P2Q9	PRPF8	ENSG00000274442	220 kDa U5 snRNP-specific protein
scaffold19055	1207	722	EOG09370082	9606:00364c	Q07864	POLE	ENSG00000177084	DNA polymerase II subunit A
scaffold15710	679	613	EOG093700N7	9606:001f71	Q8N122	RPTOR	ENSG00000141564	p150 target of rapamycin (TOR)-scaffold protein
scaffold19333	981.2	1130	EOG0937017X	9606:000d83	Q9UQE7	SMC3	ENSG00000108055	Basement membrane-associated chondroitin proteoglycan
scaffold10033	1427.1	890	EOG0937018Z	9606:000624	O14980	XPO1	ENSG00000082898	Chromosome region maintenance 1 protein homolog
scaffold6303	1471.4	885	EOG0937019B	9606:00113f	O75533	SF3B1	ENSG00000115524	Pre-mRNA-splicing factor SF3b 155 kDa subunit
scaffold11111	400.9	717	EOG093701EE	9606:000c58	A0A024R7N2	ATP13A1	ENSG00000105726	Cation-transporting ATPase
C746671	635.5	397	EOG093701IQ	9606:0005d5	Q6ZRS2	SRCAP	ENSG00000080603	Domino homolog 2
scaffold19342	950.9	585	EOG093701S0	9606:000048	A0A024R7L8	UPF1	ENSG00000005007	UPF1 regulator of nonsense transcripts homolog (yeast)
scaffold20203	1096.3	611	EOG093701SQ	9606:003f8a	P41252	IARS	ENSG00000196305	Isoleucyl-tRNA synthetase
scaffold19064	653.2	544	EOG093701V7	9606:001b3d	Q9H0A0	NAT10	ENSG00000135372	N-acetyltransferase 10
scaffold19609	330.3	397	EOG0937029K	9606:0020d1	Q9P1Q0	VPS54	ENSG00000143952	Hepatocellular carcinoma protein 8
scaffold19610	329.4	397	EOG0937029K	9606:0020d1	Q9P1Q0	VPS54	ENSG00000143952	Hepatocellular carcinoma protein 8
C656317	256.4	126	EOG093702AT	9606:000805	Q99459	CDC5L	ENSG00000096401	Pombe cdc5-related protein
C720787	197.7	176	EOG093702DP	9606:001bb5	Q9UBZ9	REV1	ENSG00000135945	Alpha integrin-binding protein 80
scaffold10737	354.7	371	EOG093702MJ	9606:001c78	A0A024R179	NCBP1	ENSG00000136937	nuclear cap binding protein subunit 1, 80kDa
scaffold10738	356.4	371	EOG093702MJ	9606:001c78	A0A024R179	NCBP1	ENSG00000136937	nuclear cap binding protein subunit 1, 80kDa
C744751	299.4	627	EOG093702PE	9606:002c8d	Q9H6R4	NOL6	ENSG00000165271	Nucleolar RNA-associated protein
scaffold11767	558.8	406	EOG0937033T	9606:000388	O14617	AP3D1	ENSG00000065000	Adaptor-related protein complex 3 subunit delta-1
scaffold14434	159.2	92	EOG0937036L	9606:000d4a	Q14152	EIF3A	ENSG00000107581	eIF3 p167
scaffold18698	578	372	EOG093703C8	9606:002a23	P19447	ERCC3	ENSG00000163161	Basic transcription factor 2 89 kDa subunit
C739817	320.2	461	EOG093703DY	9606:001bde	Q96JB2	COG3	ENSG00000136152	Component of oligomeric Golgi complex 3
scaffold17554	243	274	EOG093703N5	9606:001260	Q68CQ4	DIEXF	ENSG00000117597	Digestive organ expansion factor homolog
scaffold6144	936.6	598	EOG093703UX	9606:00337a	Q6IA69	NADSYN1	ENSG00000172890	NAD(+) synthase
scaffold19369	362.9	361	EOG093703W1	9606:00036d	Q6P1X5	TAF2	ENSG00000064313	150 kDa cofactor of initiator function
scaffold19369	362.9	361	EOG093703W1	9606:000370	H3BNR1	BORCS8-MEF2B	ENSG00000064489	Similarity:Contains 1 MADS-box domain.
C742931	736.1	589	EOG093703WD	9606:000429	Q96QK1	VPS35	ENSG00000069329	Maternal-embryonic 3
C741965	368.2	450	EOG093703YA	9606:0004da	P46459	NSF	ENSG00000073969	N-ethylmaleimide-sensitive fusion protein
C741965	368.2	450	EOG093703YA	9606:00518a	\N	NSF	ENSG00000276262	N-ethylmaleimide-sensitive factor
C741965	368.2	450	EOG093703YA	9606:005316	P46459	NSF	ENSG00000278174	N-ethylmaleimide-sensitive fusion protein
C745775	367.3	483	EOG093703YA	9606:0004da	P46459	NSF	ENSG00000073969	N-ethylmaleimide-sensitive fusion protein
C745775	367.3	483	EOG093703YA	9606:00518a	\N	NSF	ENSG00000276262	N-ethylmaleimide-sensitive factor
C745775	367.3	483	EOG093703YA	9606:005316	P46459	NSF	ENSG00000278174	N-ethylmaleimide-sensitive fusion protein
scaffold9464	348.2	529	EOG0937049Y	9606:000a8f	H3BVG0	NUP93	ENSG00000102900	nucleoporin 93kDa
scaffold9465	346.7	529	EOG0937049Y	9606:000a8f	H3BVG0	NUP93	ENSG00000102900	nucleoporin 93kDa
scaffold8548	370.3	292	EOG093704GD	9606:0019e3	A0A024RDW5	COG6	ENSG00000133103	component of oligomeric golgi complex 6
scaffold3362	649.8	353	EOG093704HC	9606:001871	A0A024RBY4	EIF2S3	ENSG00000130741	eukaryotic translation initiation factor 2, subunit 3 gamma, 52kDa
scaffold3362	649.8	353	EOG093704HC	9606:003862	Q2VIR3	\N	ENSG00000180574	Eukaryotic translation initiation factor 2 subunit gamma A
scaffold13955	857.7	580	EOG093704J7	9606:0008bb	B1AHB0	MCM5	ENSG00000100297	DNA helicase
scaffold13956	856.8	580	EOG093704J7	9606:0008bb	B1AHB0	MCM5	ENSG00000100297	DNA helicase
scaffold20136	558.8	487	EOG093704Q0	9606:00146d	P54278	PMS2	ENSG00000122512	DNA mismatch repair protein PMS2
scaffold5435	154	139	EOG093704UY	9606:001af9	Q8NI36	WDR36	ENSG00000134987	T-cell activation WD repeat-containing protein
scaffold5435	154	139	EOG093704UY	9606:001b19	P0CE71	OCM2	ENSG00000135175	Putative oncomodulin-2
C745421	700.3	648	EOG0937050C	9606:001535	P55060	CSE1L	ENSG00000124207	Cellular apoptosis susceptibility protein
scaffold5097	375.7	287	EOG093705DM	9606:0019ee	A0A024RDQ8	RFC3	ENSG00000133119	replication factor C (activator 1) 3, 38kDa
scaffold20181	455.6	445	EOG093705E5	9606:0001ca	Q99797	MIPEP	ENSG00000027001	Mitochondrial intermediate peptidase
scaffold19359	608.9	471	EOG093705EY	9606:001195	Q9NSD9	FARSB	ENSG00000116120	Phenylalanyl-tRNA synthetase beta subunit
scaffold41	192.6	233	EOG093705KN	9606:001165	Q9BSC4	NOL10	ENSG00000115761	Nucleolar protein 10
scaffold15163	209.4	186	EOG093705U4	9606:003368	Q8IU60	DCP2	ENSG00000172795	mRNA-decapping enzyme 2
scaffold18949	611.8	436	EOG093705VV	9606:003247	Q16134	ETFDH	ENSG00000171503	Electron-transferring-flavoprotein dehydrogenase
scaffold381	780.6	536	EOG093705YA	9606:000ca5	P41250	GARS	ENSG00000106105	Diadenosine tetraphosphate synthetase
scaffold13394	206.9	358	EOG093705YE	9606:002259	Q5C9Z4	NOM1	ENSG00000146909	SGD1 homolog
scaffold13644	518.9	254	EOG093705Z6	9606:001a4d	Q9H9T3	ELP3	ENSG00000134014	Elongator complex protein 3
C745481	569.6	788	EOG0937060I	9606:002414	Q8IY37	DHX37	ENSG00000150990	DEAH box protein 37
C746111	595.8	774	EOG0937060I	9606:002414	Q8IY37	DHX37	ENSG00000150990	DEAH box protein 37
C739403	59.4	311	EOG0937066G	9606:00039b	Q15046	KARS	ENSG00000065427	Lysyl-tRNA synthetase
C743289	390.7	421	EOG0937068H	9606:0001bf	Q9UGP8	SEC63	ENSG00000025796	Translocation protein SEC63 homolog
scaffold11687	388.1	259	EOG093706PM	9606:000190	P49959	MRE11	ENSG00000020922	Meiotic recombination 11 homolog 1
scaffold11687	388.1	259	EOG093706PM	9606:000193	Q9HB55	CYP3A43	ENSG00000021461	Cytochrome P450 3A43
scaffold11688	406.6	332	EOG093706PM	9606:000190	P49959	MRE11	ENSG00000020922	Meiotic recombination 11 homolog 1
scaffold11688	406.6	332	EOG093706PM	9606:000193	Q9HB55	CYP3A43	ENSG00000021461	Cytochrome P450 3A43
C742859	542.3	549	EOG093706RN	9606:000aae	J3KNI1	COG4	ENSG00000103051	component of oligomeric golgi complex 4
scaffold5433	225.5	400	EOG093706X0	9606:003ee2	Q9Y3T9	NOC2L	ENSG00000188976	NOC2-like protein
scaffold5434	225.6	400	EOG093706X0	9606:003ee2	Q9Y3T9	NOC2L	ENSG00000188976	NOC2-like protein
C728769	650.1	373	EOG09370762	9606:001395	P17987	TCP1	ENSG00000120438	CCT-alpha
C741353	448.7	454	EOG093707B7	9606:002f08	Q9UHB9	SRP68	ENSG00000167881	Signal recognition particle 68 kDa protein
C740977	441.9	480	EOG093707HK	9606:0041b0	Q9NVU7	SDAD1	ENSG00000198301	Nucleolar protein 130
C740027	369	412	EOG093707LO	9606:002b14	Q96AA3	RFT1	ENSG00000163933	Protein RFT1 homolog
scaffold14218	559.3	501	EOG093707RF	9606:000152	Q96FC9	DDX11	ENSG00000013573	CHL1-related protein 1
scaffold10765	409	505	EOG093707VN	9606:002edd	Q2NL82	TSR1	ENSG00000167721	Pre-rRNA-processing protein TSR1 homolog
C740273	262.3	408	EOG093707VQ	9606:002389	Q9Y4L1	HYOU1	ENSG00000149428	150 kDa oxygen-regulated protein
C740273	262.3	408	EOG093707VQ	9606:005493	Q9Y4L1	HYOU1	ENSG00000280682	150 kDa oxygen-regulated protein
C741447	258.5	415	EOG093707VQ	9606:002389	Q9Y4L1	HYOU1	ENSG00000149428	150 kDa oxygen-regulated protein
C741447	258.5	415	EOG093707VQ	9606:005493	Q9Y4L1	HYOU1	ENSG00000280682	150 kDa oxygen-regulated protein
scaffold3463	292.9	371	EOG0937084T	9606:0007be	O75419	CDC45	ENSG00000093009	PORC-PI-1
scaffold9801	289.5	199	EOG0937085E	9606:003051	C9JA08	NMD3	ENSG00000169251	NMD3 ribosome export adaptor
C739739	417.1	362	EOG093708IM	9606:000867	B2RDF2	PES1	ENSG00000100029	Pescadillo homolog
scaffold593	614.3	369	EOG093708OP	9606:002ef7	E5KNH5	NDUFV1	ENSG00000167792	NADH dehydrogenase (ubiquinone) flavoprotein 1, 51kDa
scaffold13518	334.8	311	EOG093708TP	9606:002aba	P49915	GMPS	ENSG00000163655	Glutamine amidotransferase
C744317	749.8	526	EOG0937091Y	9606:000c17	P18858	LIG1	ENSG00000105486	DNA ligase I
scaffold13978	208	330	EOG0937092T	9606:002174	Q13144	EIF2B5	ENSG00000145191	eIF-2B GDP-GTP exchange factor subunit epsilon
scaffold11673	468.4	435	EOG0937092W	9606:001f33	Q5VIR6	VPS53	ENSG00000141252	Vacuolar protein sorting-associated protein 53 homolog
scaffold16388	660.1	447	EOG093709BZ	9606:002e33	P56192	MARS	ENSG00000166986	Methionyl-tRNA synthetase
scaffold16389	658.3	447	EOG093709BZ	9606:002e33	P56192	MARS	ENSG00000166986	Methionyl-tRNA synthetase
scaffold11197	432.1	382	EOG093709HP	9606:00071c	Q7Z569	BRAP	ENSG00000089234	BRAP2
scaffold2077	350	369	EOG093709JG	9606:001f1b	Q9BQ70	TCF25	ENSG00000141002	Nuclear localized protein 1
scaffold2078	349.6	368	EOG093709JG	9606:001f1b	Q9BQ70	TCF25	ENSG00000141002	Nuclear localized protein 1
scaffold10388	404	298	EOG09370A22	9606:002c7e	P37287	PIGA	ENSG00000165195	GlcNAc-PI synthesis protein
scaffold10892	626.5	382	EOG09370ADO	9606:000214	Q9NRH3	TUBG2	ENSG00000037042	Gamma-2-tubulin
scaffold10892	626.5	382	EOG09370ADO	9606:0018e7	P23258	TUBG1	ENSG00000131462	Gamma-1-tubulin
C732333	263	239	EOG09370AI8	9606:0001ed	Q9BT22	ALG1	ENSG00000033011	Asparagine-linked glycosylation protein 1 homolog
C732333	263	239	EOG09370AI8	9606:003f35	A0A087WZJ8	ALG1L	ENSG00000189366	ALG1, chitobiosyldiphosphodolichol beta-mannosyltransferase-like
C732333	263	239	EOG09370AI8	9606:004c3e	C9J202	ALG1L2	ENSG00000251287	Putative glycosyltransferase ALG1L2
scaffold2810	588.5	397	EOG09370AJP	9606:000773	A0A024R713	DLD	ENSG00000091140	Dihydrolipoyl dehydrogenase
C735713	436.1	349	EOG09370AL3	9606:000649	O75844	ZMPSTE24	ENSG00000084073	Farnesylated proteins-converting enzyme 1
C738271	395.7	339	EOG09370ARO	9606:000887	B0QY89	EIF3L	ENSG00000100129	Eukaryotic translation initiation factor 3 subunit 6-interacting protein
scaffold14085	325.7	325	EOG09370AS9	9606:0003d0	Q7Z4G4	TRMT11	ENSG00000066651	tRNA guanosine-2'-O-methyltransferase TRM11 homolog
scaffold15973	330.1	232	EOG09370AV1	9606:002c3d	A0A087WT20	DCAF13	ENSG00000164934	DDB1 and CUL4 associated factor 13
scaffold19397	213.8	153	EOG09370AWB	9606:000b4e	P60228	EIF3E	ENSG00000104408	eIF-3 p48
scaffold18084	187.6	138	EOG09370B1L	9606:00014b	O95394	PGM3	ENSG00000013375	Acetylglucosamine phosphomutase
scaffold19278	129.6	142	EOG09370B65	9606:000744	E7ESC7	MAEA	ENSG00000090316	Similarity:Contains CTLH domain.
scaffold2627	269.2	215	EOG09370B7D	9606:000095	Q12887	COX10	ENSG00000006695	Heme O synthase
C735927	556.1	339	EOG09370BBR	9606:00188a	O60832	DKC1	ENSG00000130826	CBF5 homolog
scaffold8511	302.8	305	EOG09370BGO	9606:0005a2	A0A087WWS1	THOC1	ENSG00000079134	THO complex 1
scaffold19928	415.9	307	EOG09370BJE	9606:0006c6	Q13435	SF3B2	ENSG00000087365	Pre-mRNA-splicing factor SF3b 145 kDa subunit
scaffold4125	285.3	300	EOG09370BK5	9606:000ec0	P32780	GTF2H1	ENSG00000110768	Basic transcription factor 2 62 kDa subunit
scaffold17045	203.2	271	EOG09370BQO	9606:003318	E9PL17	CLP1	ENSG00000172409	Polyadenylation factor Clp1
scaffold6249	178.4	234	EOG09370BQO	9606:003318	E9PL17	CLP1	ENSG00000172409	Polyadenylation factor Clp1
C736535	336.9	380	EOG09370BYX	9606:0017d6	Q9UBL3	ASH2L	ENSG00000129691	ASH2-like protein
C736685	289.7	440	EOG09370C5A	9606:003ca5	A0A024R4C1	POLR3C	ENSG00000186141	polymerase (RNA) III (DNA directed) polypeptide C (62kD)
scaffold6172	339.8	257	EOG09370CAN	9606:000e65	O75312	ZPR1	ENSG00000109917	Zinc finger protein 259
scaffold19766	589.4	546	EOG09370CAV	9606:00211e	Q8IYB7	DIS3L2	ENSG00000144535	DIS3-like exonuclease 2
scaffold4572	118.1	175	EOG09370CF1	9606:003522	Q9UPQ8	DOLK	ENSG00000175283	Transmembrane protein 15
scaffold4573	118.2	175	EOG09370CF1	9606:003522	Q9UPQ8	DOLK	ENSG00000175283	Transmembrane protein 15
C743683	272.9	203	EOG09370CIV	9606:002f3b	Q15637	SF1	ENSG00000168066	Mammalian branch point-binding protein
scaffold13829	263.2	216	EOG09370CIV	9606:002f3b	Q15637	SF1	ENSG00000168066	Mammalian branch point-binding protein
scaffold12296	197.1	267	EOG09370CK6	9606:002556	P29083	GTF2E1	ENSG00000153767	General transcription factor IIE 56 kDa subunit
C722225	169.1	195	EOG09370CKL	9606:0014e4	P17707	AMD1	ENSG00000123505	S-adenosylmethionine decarboxylase proenzyme
scaffold3879	321.1	220	EOG09370CRF	9606:002d6b	P61201	COPS2	ENSG00000166200	Alien homolog
scaffold3880	320.9	220	EOG09370CRF	9606:002d6b	P61201	COPS2	ENSG00000166200	Alien homolog
scaffold4442	495.7	363	EOG09370CTU	9606:004a6b	O15209	ZBTB22	ENSG00000237056	Protein BING1
scaffold4442	495.7	363	EOG09370CTU	9606:004ba8	P39656	DDOST	ENSG00000244038	Dolichyl-diphosphooligosaccharide--protein glycosyltransferase 48 kDa subunit
C739693	277.2	241	EOG09370CZ0	9606:0016a4	Q32P41	TRMT5	ENSG00000126814	M1G-methyltransferase
C732761	203.8	196	EOG09370CZT	9606:002f15	Q86UK7	ZNF598	ENSG00000167962	Zinc finger protein 598
scaffold13655	501.2	463	EOG09370D13	9606:0035a5	Q12996	CSTF3	ENSG00000176102	CF-1 77 kDa subunit
scaffold15742	274.5	315	EOG09370DO5	9606:000cf1	A0A087WWF6	POLD2	ENSG00000106628	polymerase (DNA directed), delta 2, accessory subunit
C701679	168.3	131	EOG09370DP4	9606:0028e2	A0A0A0MT64	FDXR	ENSG00000161513	NADPH:adrenodoxin oxidoreductase, mitochondrial
scaffold13831	65.1	49	EOG09370DS4	9606:003e63	A0A024RDU9	GTF2F2	ENSG00000188342	Transcription initiation factor IIF subunit beta
C739725	359.6	428	EOG09370DTG	9606:0005d6	Q15397	PUM3	ENSG00000080608	HBV XAg-transactivated protein 5
C734283	380.5	305	EOG09370DV4	9606:00416f	P49642	PRIM1	ENSG00000198056	DNA primase 49 kDa subunit
C745811	248.4	208	EOG09370DX4	9606:000e7a	Q96C86	DCPS	ENSG00000110063	DCS-1
scaffold2112	201.6	234	EOG09370DXT	9606:0036e7	Q9NPF5	DMAP1	ENSG00000178028	DNA methyltransferase 1-associated protein 1
C737851	234.7	221	EOG09370DYK	9606:002121	Q96BW9	TAMM41	ENSG00000144559	CDP-diacylglycerol synthase
C737851	234.7	221	EOG09370DYK	9606:00541b	A0A0G2JQ92	TAMM41	ENSG00000279643	TAM41, mitochondrial translocator assembly and maintenance protein, homolog (S. cerevisiae)
scaffold14327	535.8	332	EOG09370E0Y	9606:001e99	A0A024R6K8	WARS	ENSG00000140105	Similarity:Belongs to the class-I aminoacyl-tRNA synthetase family.
C735991	195.4	242	EOG09370E36	9606:00176a	O14929	HAT1	ENSG00000128708	Histone acetyltransferase 1
C697200	215.6	163	EOG09370E4U	9606:000314	Q9BVS4	RIOK2	ENSG00000058729	RIO kinase 2
C568151	60.6	60	EOG09370E4W	9606:000fd5	Q13895	BYSL	ENSG00000112578	Bystin
scaffold5249	353.1	383	EOG09370E8S	9606:000265	A0A024R7U9	ATP6V1H	ENSG00000047249	ATPase, H+ transporting, lysosomal 50/57kDa, V1 subunit H
scaffold5250	353.2	383	EOG09370E8S	9606:000265	A0A024R7U9	ATP6V1H	ENSG00000047249	ATPase, H+ transporting, lysosomal 50/57kDa, V1 subunit H
scaffold5251	353.1	383	EOG09370E8S	9606:000265	A0A024R7U9	ATP6V1H	ENSG00000047249	ATPase, H+ transporting, lysosomal 50/57kDa, V1 subunit H
scaffold4228	395.6	234	EOG09370EHZ	9606:000ae4	Q5JPH6	EARS2	ENSG00000103356	Glutamyl-tRNA synthetase
C742949	297.9	363	EOG09370EL3	9606:0035c3	Q9UJX6	ANAPC2	ENSG00000176248	Cyclosome subunit 2
scaffold16358	309.3	237	EOG09370ER5	9606:001d8f	Q9NWL6	ASNSD1	ENSG00000138381	HCV NS3-transactivated protein 1
scaffold11010	26.8	169	EOG09370F1Q	9606:0050fd	Q9NY61	AATF	ENSG00000275700	Apoptosis-antagonizing transcription factor
scaffold11010	26.8	169	EOG09370F1Q	9606:00515d	\N	AATF	ENSG00000276072	apoptosis antagonizing transcription factor
C726377	220.9	236	EOG09370F3T	9606:00103d	A0A024R045	RAD1	ENSG00000113456	RAD1 checkpoint DNA exonuclease
scaffold17840	461.1	269	EOG09370F47	9606:0007d3	A0A087WZK0	DHPS	ENSG00000095059	deoxyhypusine synthase
scaffold19855	236	258	EOG09370FKI	9606:001d1e	Q92541	RTF1	ENSG00000137815	RNA polymerase-associated protein RTF1 homolog
C705541	262.5	172	EOG09370FLD	9606:002ab4	Q15008	PSMD6	ENSG00000163636	26S proteasome regulatory subunit RPN7
C725253	465.2	281	EOG09370FN1	9606:003488	P36578	RPL4	ENSG00000174444	60S ribosomal protein L1
C725295	497	282	EOG09370FN1	9606:003488	P36578	RPL4	ENSG00000174444	60S ribosomal protein L1
C739617	366.3	377	EOG09370FSS	9606:0006d5	A2A2G4	ALG6	ENSG00000088035	Transmembrane:Helical
scaffold2680	275.4	239	EOG09370FVX	9606:0024f0	Q9BRX2	PELO	ENSG00000152684	Protein pelota homolog
scaffold15998	510.1	312	EOG09370FWQ	9606:002fa0	P39748	FEN1	ENSG00000168496	DNase IV
C724205	135.8	151	EOG09370FXE	9606:0022ff	E5KRX5	SURF1	ENSG00000148290	surfeit 1
C724205	135.8	151	EOG09370FXE	9606:005485	E5KRX5	SURF1	ENSG00000280627	surfeit 1
scaffold19088	161.6	156	EOG09370GC2	9606:0000f0	Q9NP79	VTA1	ENSG00000009844	Dopamine-responsive gene 1 protein
scaffold3357	153.3	173	EOG09370GEO	9606:00117a	A0A024R411	ORC2	ENSG00000115942	origin recognition complex, subunit 2
scaffold11265	74.3	213	EOG09370GHM	9606:000fea	P33981	TTK	ENSG00000112742	Phosphotyrosine picked threonine-protein kinase
scaffold7941	79.7	176	EOG09370GHM	9606:000fea	P33981	TTK	ENSG00000112742	Phosphotyrosine picked threonine-protein kinase
scaffold13536	130.9	160	EOG09370GHP	9606:000d29	Q92546	RGP1	ENSG00000107185	Retrograde Golgi transport protein RGP1 homolog
scaffold2455	335.9	222	EOG09370GIK	9606:0013df	A0A024R7W9	COPS5	ENSG00000121022	COP9 signalosome subunit 5
scaffold16963	244.4	224	EOG09370GJ7	9606:004080	O00232	PSMD12	ENSG00000197170	26S proteasome regulatory subunit p55
scaffold5448	250	275	EOG09370GK0	9606:0005c7	Q9NQQ7	SLC35C2	ENSG00000080189	Ovarian cancer-overexpressed gene 1 protein
scaffold5449	257.2	276	EOG09370GK0	9606:0005c7	Q9NQQ7	SLC35C2	ENSG00000080189	Ovarian cancer-overexpressed gene 1 protein
scaffold1503	381.2	261	EOG09370H3E	9606:0041bb	O43681	ASNA1	ENSG00000198356	Arsenical pump-driving ATPase
scaffold12205	134.1	238	EOG09370H68	9606:001559	O00566	MPHOSPH10	ENSG00000124383	M phase phosphoprotein 10
C739361	360.8	382	EOG09370HBN	9606:001a97	Q6P1J9	CDC73	ENSG00000134371	Cell division cycle protein 73 homolog
C700083	185.3	140	EOG09370HD7	9606:0032f2	A0A024R3H8	DPAGT1	ENSG00000172269	Transmembrane:Helical
C710221	249.5	199	EOG09370HKV	9606:003985	Q8TAT6	NPLOC4	ENSG00000182446	Nuclear protein localization protein 4 homolog
C723377	194	186	EOG09370HVI	9606:0020f1	Q9Y234	LIPT1	ENSG00000144182	Lipoate biosynthesis protein
scaffold12326	145.2	100	EOG09370I3J	9606:0045ce	A0A024RDX4	NAXD	ENSG00000213995	carbohydrate kinase domain containing
C729985	419.2	263	EOG09370I7R	9606:001fda	Q7Z7A3	CTU1	ENSG00000142544	ATP-binding domain-containing protein 3
scaffold9093	164.6	156	EOG09370IF5	9606:002167	A0A024R2U7	AMT	ENSG00000145020	Aminomethyltransferase
scaffold11413	143.3	131	EOG09370IH5	9606:0029ea	Q9Y316	MEMO1	ENSG00000162959	C21orf19-like protein
scaffold11413	143.3	131	EOG09370IH5	9606:002a2a	P49901	SMCP	ENSG00000163206	Sperm mitochondrial-associated cysteine-rich protein
scaffold2592	99.1	105	EOG09370IMU	9606:001bd2	Q86VN1	VPS36	ENSG00000136100	ELL-associated protein of 45 kDa
scaffold1146	80.5	109	EOG09370INZ	9606:000ddb	O00623	PEX12	ENSG00000108733	Peroxin-12
scaffold3178	374.9	218	EOG09370IUA	9606:002006	Q92643	PIGK	ENSG00000142892	GPI8 homolog
scaffold16633	164.3	156	EOG09370J9L	9606:0009ef	O43148	RNMT	ENSG00000101654	mRNA cap methyltransferase
C708517	277.2	204	EOG09370JIK	9606:000b9b	O75792	RNASEH2A	ENSG00000104889	Aicardi-Goutieres syndrome 4 protein
scaffold11167	73.7	152	EOG09370JW6	9606:000e64	G5E9D4	ELP4	ENSG00000109911	elongator acetyltransferase complex subunit 4
scaffold11167	73.7	152	EOG09370JW6	9606:002243	C9J370	POMZP3	ENSG00000146707	POM121 and ZP3 fusion
scaffold11167	73.7	152	EOG09370JW6	9606:0053c9	A0A096LP20	\N	ENSG00000278883	Uncharacterized protein
scaffold11167	73.7	152	EOG09370JW6	9606:0053ec	A0A096LPI1	\N	ENSG00000279244	Uncharacterized protein
scaffold11167	73.7	152	EOG09370JW6	9606:005422	A0A096LNW3	\N	ENSG00000279745	Uncharacterized protein
scaffold11167	73.7	152	EOG09370JW6	9606:005457	A0A096LPF6	\N	ENSG00000280226	Uncharacterized protein
C745445	215.7	195	EOG09370JZ3	9606:003661	E5KMT5	PUS1	ENSG00000177192	tRNA pseudouridine synthase
scaffold16774	176.9	168	EOG09370K15	9606:002025	O75663	TIPRL	ENSG00000143155	Putative MAPK-activating protein PM10
C745017	229.7	211	EOG09370K1R	9606:002cd9	P36542	ATP5C1	ENSG00000165629	F-ATPase gamma subunit
C739351	367.5	249	EOG09370KD4	9606:000f28	Q13601	KRR1	ENSG00000111615	HIV-1 Rev-binding protein 2
scaffold19923	119.1	92	EOG09370KGV	9606:00179b	P32321	DCTD	ENSG00000129187	dCMP deaminase
C721553	187.8	175	EOG09370KJ3	9606:001866	Q13868	EXOSC2	ENSG00000130713	Exosome component 2
C697974	38.2	89	EOG09370KM9	9606:001afd	Q5VZE5	NAA35	ENSG00000135040	Embryonic growth-associated protein homolog
C732047	151.4	173	EOG09370KOV	9606:001995	Q9H1D9	POLR3F	ENSG00000132664	DNA-directed RNA polymerase III subunit F
scaffold6444	85.8	154	EOG09370KWF	9606:0028df	Q96FM1	PGAP3	ENSG00000161395	COS16 homolog
scaffold6445	91.3	179	EOG09370KWF	9606:0028df	Q96FM1	PGAP3	ENSG00000161395	COS16 homolog
scaffold6446	88.5	164	EOG09370KWF	9606:0028df	Q96FM1	PGAP3	ENSG00000161395	COS16 homolog
C711055	254.1	193	EOG09370KYZ	9606:0041e2	Q9HCN4	GPN1	ENSG00000198522	MBD2-interacting protein
scaffold15441	313.9	219	EOG09370L23	9606:001258	Q9H2P9	DPH5	ENSG00000117543	Diphthamide biosynthesis methyltransferase
C736723	229.8	298	EOG09370L77	9606:000159	Q14181	POLA2	ENSG00000014138	DNA polymerase alpha 70 kDa subunit
scaffold17694	53.4	151	EOG09370LFI	9606:00068d	Q9UNQ2	DIMT1	ENSG00000086189	DIM1 dimethyladenosine transferase 1 homolog
scaffold20236	318.6	302	EOG09370LGH	9606:0006c1	Q9H9P8	L2HGDH	ENSG00000087299	Duranin
scaffold20178	355.4	305	EOG09370LMP	9606:00130e	A0A024R184	ALG2	ENSG00000119523	ALG2, alpha-1,3/1,6-mannosyltransferase
scaffold16970	157.4	210	EOG09370LQ2	9606:000720	P78318	IGBP1	ENSG00000089289	B-cell signal transduction molecule alpha 4
scaffold17672	212.6	312	EOG09370LYY	9606:000bb8	O43615	TIMM44	ENSG00000104980	Mitochondrial import inner membrane translocase subunit TIM44
scaffold18123	313.4	203	EOG09370M9E	9606:000002	H0Y368	DPM1	ENSG00000000419	dolichyl-phosphate mannosyltransferase polypeptide 1, catalytic subunit
C735275	300.1	247	EOG09370MAO	9606:001a4a	P05198	EIF2S1	ENSG00000134001	Eukaryotic translation initiation factor 2 subunit alpha
scaffold7584	249.8	180	EOG09370MDU	9606:0027e6	P28070	PSMB4	ENSG00000159377	26 kDa prosomal protein
scaffold12879	135	145	EOG09370MGF	9606:001f2a	Q9ULX3	NOB1	ENSG00000141101	Phosphorylation regulatory protein HP-10
scaffold2852	282.9	261	EOG09370MHI	9606:000930	A0A024R6Q1	EIF5	ENSG00000100664	eukaryotic translation initiation factor 5
scaffold592	338.1	229	EOG09370MMK	9606:000ecb	Q5HYK3	COQ5	ENSG00000110871	Ubiquinone biosynthesis methyltransferase COQ5
scaffold11708	268.9	191	EOG09370MQ0	9606:0016c2	Q9HAB8	PPCS	ENSG00000127125	Phosphopantothenoylcysteine synthetase
C686992	318.6	171	EOG09370MZ4	9606:002bae	O95478	NSA2	ENSG00000164346	Hairy cell leukemia protein 1
scaffold11780	316.2	166	EOG09370MZ4	9606:002bae	O95478	NSA2	ENSG00000164346	Hairy cell leukemia protein 1
scaffold13849	384.3	280	EOG09370N7W	9606:001d7a	Q9UK59	DBR1	ENSG00000138231	Lariat debranching enzyme
C721567	264.8	242	EOG09370NBT	9606:0040d1	Q9H7B2	RPF2	ENSG00000197498	Brix domain-containing protein 1
scaffold14602	155.9	178	EOG09370NBW	9606:002a25	Q96ST2	IWS1	ENSG00000163166	IWS1-like protein
scaffold16996	89.2	80	EOG09370NHX	9606:00391c	Q5T440	IBA57	ENSG00000181873	Iron-sulfur cluster assembly factor homolog
scaffold16719	155.1	158	EOG09370NIG	9606:002848	O00764	PDXK	ENSG00000160209	Pyridoxine kinase
C714647	232.3	195	EOG09370O06	9606:0027ca	Q96H20	SNF8	ENSG00000159210	ELL-associated protein of 30 kDa
scaffold20111	266.8	196	EOG09370O51	9606:000bff	P38117	ETFB	ENSG00000105379	Electron transfer flavoprotein subunit beta
scaffold18360	265.7	231	EOG09370OFR	9606:001827	Q9H0R6	QRSL1	ENSG00000130348	Glutaminyl-tRNA synthase-like protein 1
scaffold4886	120.2	189	EOG09370OGU	9606:00123d	H7C2Q8	EBNA1BP2	ENSG00000117395	EBNA1 binding protein 2
scaffold4887	119	189	EOG09370OGU	9606:00123d	H7C2Q8	EBNA1BP2	ENSG00000117395	EBNA1 binding protein 2
scaffold4888	119.6	189	EOG09370OGU	9606:00123d	H7C2Q8	EBNA1BP2	ENSG00000117395	EBNA1 binding protein 2
scaffold271	140.5	167	EOG09370OGW	9606:000c43	M0QXB4	COPE	ENSG00000105669	coatomer protein complex, subunit epsilon
scaffold272	140.5	167	EOG09370OGW	9606:000c43	M0QXB4	COPE	ENSG00000105669	coatomer protein complex, subunit epsilon
C661235	171.6	125	EOG09370OHP	9606:002d5e	A0A024R6Q2	TRMT61A	ENSG00000166166	tRNA methyltransferase 61A
C707985	169.5	176	EOG09370OLY	9606:001685	A0A087X020	SBDS	ENSG00000126524	Shwachman-Bodian-Diamond syndrome
C729597	255.6	196	EOG09370OO3	9606:002e4e	Q9Y3A0	COQ4	ENSG00000167113	Coenzyme Q biosynthesis protein 4 homolog
C724359	141.7	146	EOG09370OS5	9606:00144c	Q9Y399	MRPS2	ENSG00000122140	28S ribosomal protein S2, mitochondrial
C713635	197.8	136	EOG09370OUS	9606:0010aa	A8K5J1	UMPS	ENSG00000114491	uridine monophosphate synthetase
scaffold16049	99.2	97	EOG09370P2W	9606:002516	P09132	SRP19	ENSG00000153037	Signal recognition particle 19 kDa protein
scaffold16049	99.2	97	EOG09370P2W	9606:002545	Q8TB05	UBALD1	ENSG00000153443	UBA-like domain-containing protein 1
scaffold16342	96.7	99	EOG09370P5Q	9606:000718	Q9UJA5	TRMT6	ENSG00000089195	tRNA(m1A58)-methyltransferase subunit TRM6
scaffold11140	100	152	EOG09370P7I	9606:0032ad	Q8N5M1	ATPAF2	ENSG00000171953	ATP12 homolog
scaffold11141	99.6	152	EOG09370P7I	9606:0032ad	Q8N5M1	ATPAF2	ENSG00000171953	ATP12 homolog
scaffold11142	99.5	152	EOG09370P7I	9606:0032ad	Q8N5M1	ATPAF2	ENSG00000171953	ATP12 homolog
scaffold19251	284.9	224	EOG09370P9T	9606:001501	Q96D53	COQ8B	ENSG00000123815	AarF domain-containing protein kinase 4
scaffold19251	284.9	224	EOG09370P9T	9606:002a03	A0A024R3S3	COQ8A	ENSG00000163050	aarF domain containing kinase 3
C709265	401.6	221	EOG09370PBD	9606:00219b	P61247	RPS3A	ENSG00000145425	v-fos transformation effector protein
C717635	376.7	221	EOG09370PBD	9606:00219b	P61247	RPS3A	ENSG00000145425	v-fos transformation effector protein
scaffold3463	378.5	221	EOG09370PBD	9606:00219b	P61247	RPS3A	ENSG00000145425	v-fos transformation effector protein
C677896	122.7	80	EOG09370PLC	9606:004602	Q9Y570	PPME1	ENSG00000214517	Protein phosphatase methylesterase 1
scaffold10947	52.9	102	EOG09370PN3	9606:000141	Q8N806	UBR7	ENSG00000012963	N-recognin-7
scaffold10947	52.9	102	EOG09370PN3	9606:004d42	G3V3Q6	\N	ENSG00000259066	Uncharacterized protein
scaffold10947	52.9	102	EOG09370PN3	9606:0053b4	Q8N806	UBR7	ENSG00000278787	N-recognin-7
scaffold11253	272.3	176	EOG09370PYJ	9606:00047d	O43709	WBSCR22	ENSG00000071462	Bud site selection protein 23 homolog
scaffold14565	98.5	106	EOG09370QBK	9606:000f11	Q13889	GTF2H3	ENSG00000111358	Basic transcription factor 2 34 kDa subunit
scaffold20233	294.5	216	EOG09370QBR	9606:001e0d	Q16795	NDUFA9	ENSG00000139180	Complex I-39kD
C735073	174.2	156	EOG09370QCX	9606:0000e4	Q99442	SEC62	ENSG00000008952	Translocation protein 1
scaffold14701	56.4	130	EOG09370QFD	9606:00338f	Q8WVC6	DCAKD	ENSG00000172992	Dephospho-CoA kinase domain-containing protein
scaffold14702	158.8	238	EOG09370QI4	9606:00107c	E5KPM5	OGG1	ENSG00000114026	8-oxoguanine DNA glycosylase
C683042	192.4	132	EOG09370QJ1	9606:000b9e	Q15428	SF3A2	ENSG00000104897	SF3a66
C718135	235.3	146	EOG09370QKS	9606:00282c	Q9NP77	SSU72	ENSG00000160075	RNA polymerase II subunit A C-terminal domain phosphatase SSU72
scaffold16679	163.4	190	EOG09370QMM	9606:000028	Q7L592	NDUFAF7	ENSG00000003509	Protein midA homolog, mitochondrial
scaffold12784	82.5	93	EOG09370QT3	9606:000bcc	O95707	POP4	ENSG00000105171	Ribonuclease P protein subunit p29
scaffold10489	255.1	234	EOG09370QVI	9606:0009a0	Q5TEU4	NDUFAF5	ENSG00000101247	Probable methyltransferase C20orf7, mitochondrial
scaffold8130	294.7	183	EOG09370R3M	9606:005131	P49720	PSMB3	ENSG00000275903	Proteasome chain 13
scaffold8130	294.7	183	EOG09370R3M	9606:0052cd	P49720	PSMB3	ENSG00000277791	Proteasome chain 13
scaffold1717	145.9	167	EOG09370R67	9606:001945	Q9BQ83	SLX1A	ENSG00000132207	GIY-YIG domain-containing protein 1
scaffold1717	145.9	167	EOG09370R67	9606:0038f3	Q9BQ83	SLX1B	ENSG00000181625	GIY-YIG domain-containing protein 1
scaffold1718	145.4	167	EOG09370R67	9606:001945	Q9BQ83	SLX1A	ENSG00000132207	GIY-YIG domain-containing protein 1
scaffold1718	145.4	167	EOG09370R67	9606:0038f3	Q9BQ83	SLX1B	ENSG00000181625	GIY-YIG domain-containing protein 1
scaffold1719	154.4	150	EOG09370R67	9606:001945	Q9BQ83	SLX1A	ENSG00000132207	GIY-YIG domain-containing protein 1
scaffold1719	154.4	150	EOG09370R67	9606:0038f3	Q9BQ83	SLX1B	ENSG00000181625	GIY-YIG domain-containing protein 1
C733729	384.2	373	EOG09370RCD	9606:000902	P56282	POLE2	ENSG00000100479	DNA polymerase epsilon subunit B
scaffold18273	287.7	189	EOG09370RCQ	9606:000bdf	Q9BW85	CCDC94	ENSG00000105248	Coiled-coil domain-containing protein 94
scaffold10319	214.4	214	EOG09370RCS	9606:00194a	O43159	RRP8	ENSG00000132275	Cerebral protein 1
C713165	277.3	138	EOG09370RIT	9606:000ebb	O00217	NDUFS8	ENSG00000110717	Complex I-23kD
scaffold20211	353.9	272	EOG09370RJN	9606:0003a2	Q8WU90	ZC3H15	ENSG00000065548	DRG family-regulatory protein 1
scaffold13743	270.9	159	EOG09370RRJ	9606:00459b	O75489	NDUFS3	ENSG00000213619	Complex I-30kD
scaffold13744	270.2	159	EOG09370RRJ	9606:00459b	O75489	NDUFS3	ENSG00000213619	Complex I-30kD
scaffold16902	118.6	116	EOG09370S0F	9606:0000ba	Q9UJK0	TSR3	ENSG00000007520	Ribosome biogenesis protein TSR3 homolog
scaffold19416	96.4	101	EOG09370S1Z	9606:002847	Q14684	RRP1B	ENSG00000160208	RRP1-like protein B
scaffold19416	96.4	101	EOG09370S1Z	9606:00284b	P56182	RRP1	ENSG00000160214	Novel nuclear protein 1
C716529	176.5	184	EOG09370S3E	9606:000968	Q14691	GINS1	ENSG00000101003	GINS complex subunit 1
scaffold15882	72.2	64	EOG09370S4T	9606:002b6d	Q9UM13	ANAPC10	ENSG00000164162	Cyclosome subunit 10
scaffold15247	147.9	144	EOG09370SC9	9606:0018c2	Q9Y248	GINS2	ENSG00000131153	GINS complex subunit 2
scaffold12865	55.5	109	EOG09370SO4	9606:0003d1	A0A024R388	THUMPD1	ENSG00000066654	THUMP domain containing 1
scaffold12866	54.9	109	EOG09370SO4	9606:0003d1	A0A024R388	THUMPD1	ENSG00000066654	THUMP domain containing 1
scaffold17283	220.4	157	EOG09370SON	9606:004169	Q9BXY0	MAK16	ENSG00000198042	NNP78
C726861	168.9	168	EOG09370SPQ	9606:0000bb	Q9BRB3	PIGQ	ENSG00000007541	N-acetylglucosamyl transferase component GPI1
scaffold15064	81	83	EOG09370SV2	9606:000ef6	F8VXU5	VPS29	ENSG00000111237	Vesicle protein sorting 29
C715287	341	246	EOG09370SYK	9606:00085d	A0A024R1K8	SF3A1	ENSG00000099995	splicing factor 3a, subunit 1, 120kDa
C666821	129.9	105	EOG09370T6W	9606:0002c2	A0A024RAE1	MRTO4	ENSG00000053372	Similarity:Belongs to the ribosomal protein L10P family.
scaffold7483	164.9	156	EOG09370T9R	9606:00117c	Q9NRX1	PNO1	ENSG00000115946	RNA-binding protein PNO1
scaffold16301	223.4	126	EOG09370TBD	9606:000a23	P41227	NAA10	ENSG00000102030	NatA catalytic subunit Naa10
scaffold16301	223.4	126	EOG09370TBD	9606:002672	Q9BSU3	NAA11	ENSG00000156269	NatA catalytic subunit Naa11
scaffold17113	114.4	148	EOG09370TBG	9606:000bd2	A0A024R0M6	TIMM50	ENSG00000105197	Similarity:Contains FCP1 homology domain.
scaffold17184	287.5	206	EOG09370TCX	9606:00021b	Q9UBP6	METTL1	ENSG00000037897	Methyltransferase-like protein 1
scaffold17185	286.1	206	EOG09370TCX	9606:00021b	Q9UBP6	METTL1	ENSG00000037897	Methyltransferase-like protein 1
scaffold16734	82.9	229	EOG09370TFO	9606:004a5c	Q92759	GTF2H4	ENSG00000236895	Basic transcription factor 2 52 kDa subunit
scaffold16734	82.9	229	EOG09370TFO	9606:004b96	O95801	TTC4	ENSG00000243725	Tetratricopeptide repeat protein 4
scaffold5968	81.2	76	EOG09370TG2	9606:001637	Q9BY32	ITPA	ENSG00000125877	Non-canonical purine NTP pyrophosphatase
C715515	177.5	141	EOG09370TG6	9606:00165b	P49721	PSMB2	ENSG00000126067	Macropain subunit C7-I
C715515	177.5	141	EOG09370TG6	9606:001672	Q9UBK5	HCST	ENSG00000126264	DNAX-activation protein 10
scaffold9699	119.3	117	EOG09370TH4	9606:002f83	P23919	DTYMK	ENSG00000168393	dTMP kinase
scaffold9979	204.3	233	EOG09370TP2	9606:0017e3	Q9BU89	DOHH	ENSG00000129932	Deoxyhypusine dioxygenase
C539343	48.9	41	EOG09370TS7	9606:001a49	A0A087WYL7	MED6	ENSG00000133997	Mediator complex subunit 6
C698872	114.9	86	EOG09370TTI	9606:000386	Q15544	TAF11	ENSG00000064995	TFIID subunit p30-beta
scaffold16125	261	219	EOG09370U0A	9606:0027e3	Q5VWC4	PSMD4	ENSG00000159352	proteasome (prosome, macropain) 26S subunit, non-ATPase, 4
scaffold16125	261	219	EOG09370U0A	9606:00281c	A0A087WT08	ZNF221	ENSG00000159905	zinc finger protein 221
scaffold9655	194.5	197	EOG09370U71	9606:00293c	Q13190	STX5	ENSG00000162236	Syntaxin-5
scaffold9656	193.8	180	EOG09370U71	9606:00293c	Q13190	STX5	ENSG00000162236	Syntaxin-5
scaffold12831	169.8	171	EOG09370U9P	9606:002551	P49247	RPIA	ENSG00000153574	Phosphoriboisomerase
scaffold2936	143.3	99	EOG09370UEC	9606:002d77	Q9Y6N1	COX11	ENSG00000166260	Cytochrome c oxidase assembly protein COX11, mitochondrial
scaffold13620	183	170	EOG09370UG9	9606:003777	Q9UBQ5	EIF3K	ENSG00000178982	eIF-3 p25
scaffold4944	236.8	141	EOG09370UID	9606:003d0a	A4D1L5	UBE2H	ENSG00000186591	Similarity:Belongs to the ubiquitin-conjugating enzyme family.
scaffold4945	237.8	141	EOG09370UID	9606:003d0a	A4D1L5	UBE2H	ENSG00000186591	Similarity:Belongs to the ubiquitin-conjugating enzyme family.
scaffold10966	230	161	EOG09370UO4	9606:001acc	Q8NAV1	PRPF38A	ENSG00000134748	Pre-mRNA-splicing factor 38A
scaffold64	113.1	123	EOG09370UR1	9606:003213	Q9Y3B2	EXOSC1	ENSG00000171311	Exosome component 1
scaffold17279	232.3	159	EOG09370UR3	9606:001989	Q9Y221	NIP7	ENSG00000132603	KD93
scaffold5422	124.4	177	EOG09370USH	9606:003900	Q96EC8	YIPF6	ENSG00000181704	YIP1 family member 6
C736605	266.2	184	EOG09370USJ	9606:001695	Q92979	EMG1	ENSG00000126749	18S rRNA (pseudouridine(1248)-N1)-methyltransferase
C680704	174.3	122	EOG09370UV4	9606:002f29	P62487	POLR2G	ENSG00000168002	DNA-directed RNA polymerase II subunit G
scaffold18202	73.1	115	EOG09370V9R	9606:00089a	Q8IWL3	HSCB	ENSG00000100209	DnaJ homolog subfamily C member 20
scaffold18357	242	244	EOG09370VFL	9606:0022c9	B3KS98	EIF3H	ENSG00000147677	eIF-3 gamma
scaffold10103	127.2	112	EOG09370VLM	9606:00082e	P30049	ATP5D	ENSG00000099624	F-ATPase delta subunit
scaffold10104	126.8	112	EOG09370VLM	9606:00082e	P30049	ATP5D	ENSG00000099624	F-ATPase delta subunit
scaffold18097	263.1	382	EOG09370VTP	9606:00032c	Q9NUD9	PIGV	ENSG00000060642	GPI mannosyltransferase II
scaffold11459	122.1	144	EOG09370VUX	9606:002b58	Q13257	MAD2L1	ENSG00000164109	Mitotic arrest deficient 2-like protein 1
scaffold2025	164.5	138	EOG09370W44	9606:001db4	Q96CD2	PPCDC	ENSG00000138621	CoaC
scaffold1469	157.1	142	EOG09370W6N	9606:002646	P61758	VBP1	ENSG00000155959	HIBBJ46
scaffold10096	217.7	166	EOG09370W86	9606:00229e	Q86WR0	CCDC25	ENSG00000147419	Coiled-coil domain-containing protein 25
C675191	170.3	103	EOG09370WT1	9606:000cb0	P41223	BUD31	ENSG00000106245	Protein EDG-2
scaffold16233	145.5	154	EOG09370WWI	9606:000ec4	O00233	PSMD9	ENSG00000110801	26S proteasome regulatory subunit p27
C679092	185.3	134	EOG09370WYG	9606:001242	E9PNL3	ATP6V0B	ENSG00000117410	Similarity:Belongs to the V-ATPase proteolipid subunit family.
scaffold15246	213.1	150	EOG09370WYG	9606:001242	E9PNL3	ATP6V0B	ENSG00000117410	Similarity:Belongs to the V-ATPase proteolipid subunit family.
scaffold19282	128.8	158	EOG09370WZX	9606:0022b2	Q9BRT9	GINS4	ENSG00000147536	GINS complex subunit 4
C606226	97.6	76	EOG09370X1T	9606:003fc0	P0DI81	TRAPPC2	ENSG00000196459	Sedlin
C606226	97.6	76	EOG09370X1T	9606:004cc9	P0DI82	TRAPPC2B	ENSG00000256060	MBP-1-interacting protein 2A
scaffold16439	108.4	88	EOG09370X1T	9606:003fc0	P0DI81	TRAPPC2	ENSG00000196459	Sedlin
scaffold16439	108.4	88	EOG09370X1T	9606:004cc9	P0DI82	TRAPPC2B	ENSG00000256060	MBP-1-interacting protein 2A
C714161	89.3	116	EOG09370XFG	9606:003927	Q9BRX5	GINS3	ENSG00000181938	GINS complex subunit 3
scaffold12896	425.6	387	EOG09370XFJ	9606:00246c	O60870	KIN	ENSG00000151657	Binding to curved DNA
scaffold12257	161.8	130	EOG09370XO6	9606:00272d	Q9P0H9	RER1	ENSG00000157916	Transmembrane:Helical
scaffold12258	161.7	130	EOG09370XO6	9606:00272d	Q9P0H9	RER1	ENSG00000157916	Transmembrane:Helical
scaffold16883	166.9	150	EOG09370XO6	9606:00272d	Q9P0H9	RER1	ENSG00000157916	Transmembrane:Helical
C671885	231.5	129	EOG09370Y63	9606:000eb8	P62277	RPS13	ENSG00000110700	40S ribosomal protein S13
C684394	225.6	133	EOG09370Y63	9606:000eb8	P62277	RPS13	ENSG00000110700	40S ribosomal protein S13
C696860	232.7	133	EOG09370Y63	9606:000eb8	P62277	RPS13	ENSG00000110700	40S ribosomal protein S13
C696132	151.3	154	EOG09370YC4	9606:004a06	P28702	RXRB	ENSG00000235712	Nuclear receptor subfamily 2 group B member 2
C696132	151.3	154	EOG09370YC4	9606:004b32	P48047	ATP5O	ENSG00000241837	Oligomycin sensitivity conferral protein
C696132	151.3	154	EOG09370YC4	9606:004bf9	H7C0C1	\N	ENSG00000249209	Uncharacterized protein
C717605	136.1	115	EOG09370YCN	9606:002b04	P52434	POLR2H	ENSG00000163882	DNA-directed RNA polymerase II subunit H
scaffold3410	248.5	280	EOG09370YSI	9606:00122b	A0A024R9B5	RBBP5	ENSG00000117222	retinoblastoma binding protein 5
scaffold3411	248.6	281	EOG09370YSI	9606:00122b	A0A024R9B5	RBBP5	ENSG00000117222	retinoblastoma binding protein 5
scaffold3412	251.3	281	EOG09370YSI	9606:00122b	A0A024R9B5	RBBP5	ENSG00000117222	retinoblastoma binding protein 5
C727149	113.8	86	EOG09370ZI7	9606:0003eb	Q5QJE6	DNTTIP2	ENSG00000067334	Estrogen receptor-binding protein
scaffold16764	138.9	179	EOG09370ZOK	9606:0034be	O76094	SRP72	ENSG00000174780	Signal recognition particle 72 kDa protein
scaffold13869	175.4	139	EOG0937106D	9606:00052f	Q9Y3B8	REXO2	ENSG00000076043	RNA exonuclease 2 homolog
scaffold4980	118	93	EOG0937106Y	9606:001e69	A0A024RBR3	DENR	ENSG00000139726	Density-regulated protein
scaffold8805	131.6	96	EOG09371088	9606:000666	\N	AK6	ENSG00000085231	adenylate kinase 6
scaffold8805	131.6	96	EOG09371088	9606:0053ed	Q9Y3D8	AK6	ENSG00000279247	Adrenal gland protein AD-004
scaffold13549	73.1	127	EOG093710A7	9606:00018d	A0A024R688	MNAT1	ENSG00000020426	MNAT CDK-activating kinase assembly factor 1
scaffold13550	72.9	126	EOG093710A7	9606:00018d	A0A024R688	MNAT1	ENSG00000020426	MNAT CDK-activating kinase assembly factor 1
C606376	64.5	63	EOG093710JH	9606:000be3	P36954	POLR2I	ENSG00000105258	DNA-directed RNA polymerase II subunit I
scaffold15282	68.9	72	EOG093710JH	9606:000be3	P36954	POLR2I	ENSG00000105258	DNA-directed RNA polymerase II subunit I
C613135	155	94	EOG093710SY	9606:001d33	A0A024R5U8	RSL24D1	ENSG00000137876	ribosomal L24 domain containing 1
scaffold7561	159.7	130	EOG093710SY	9606:001d33	A0A024R5U8	RSL24D1	ENSG00000137876	ribosomal L24 domain containing 1
scaffold7563	159.4	129	EOG093710SY	9606:001d33	A0A024R5U8	RSL24D1	ENSG00000137876	ribosomal L24 domain containing 1
C661383	241.3	119	EOG093710T1	9606:001600	A0A024R1Q8	RPL23	ENSG00000125691	Similarity:Belongs to the ribosomal protein L14P family.
C673945	230.7	119	EOG093710T1	9606:001600	A0A024R1Q8	RPL23	ENSG00000125691	Similarity:Belongs to the ribosomal protein L14P family.
C675323	232.9	119	EOG093710T1	9606:001600	A0A024R1Q8	RPL23	ENSG00000125691	Similarity:Belongs to the ribosomal protein L14P family.
C542639	53.1	40	EOG0937112Y	9606:003a5f	Q9Y3A2	UTP11	ENSG00000183520	UTP11-like protein
C682030	167	95	EOG093711E9	9606:0008eb	A0A024R1U2	PHF5A	ENSG00000100410	PHD finger protein 5A
C743179	105.4	84	EOG093711LC	9606:00174a	Q16864	ATP6V1F	ENSG00000128524	Vacuolar proton pump subunit F
C675131	115.3	102	EOG093711QY	9606:0033a1	A0A024R565	TRMT112	ENSG00000173113	tRNA methyltransferase 11-2 homolog (S. cerevisiae)
C732735	266.2	184	EOG093711ZO	9606:00186b	M0R1T5	CHMP2A	ENSG00000130724	charged multivesicular body protein 2A
scaffold3218	89.9	71	EOG0937122Q	9606:00411a	A0A024R089	TAF13	ENSG00000197780	TAF13 RNA polymerase II, TATA box binding protein (TBP)-associated factor, 18kDa
scaffold3219	89.4	71	EOG0937122Q	9606:00411a	A0A024R089	TAF13	ENSG00000197780	TAF13 RNA polymerase II, TATA box binding protein (TBP)-associated factor, 18kDa
C706981	165.8	117	EOG0937128O	9606:003efd	Q6NT46	GAGE2A	ENSG00000189064	G antigen 2A
C706981	165.8	117	EOG0937128O	9606:004577	P63272	SUPT4H1	ENSG00000213246	DRB sensitivity-inducing factor 14 kDa subunit
C706981	165.8	117	EOG0937128O	9606:004647	A6NGK3	GAGE10	ENSG00000215274	G antigen 10
scaffold2702	142.7	96	EOG0937129K	9606:0017c8	P61803	DAD1	ENSG00000129562	Defender against cell death 1
scaffold14454	165.4	124	EOG093712G8	9606:001304	P51970	NDUFA8	ENSG00000119421	Complex I-19kD
C646217	154.2	82	EOG093712Q6	9606:00088a	B0QYL9	POLR2F	ENSG00000100142	polymerase (RNA) II (DNA directed) polypeptide F
C675537	155.1	85	EOG093712Q6	9606:00088a	B0QYL9	POLR2F	ENSG00000100142	polymerase (RNA) II (DNA directed) polypeptide F
C689104	148.3	73	EOG093712Q6	9606:00088a	B0QYL9	POLR2F	ENSG00000100142	polymerase (RNA) II (DNA directed) polypeptide F
scaffold14979	145.8	124	EOG09371330	9606:00161f	A0A087WZV9	DTD1	ENSG00000125821	D-tyrosyl-tRNA(Tyr) deacylase
C662611	197.8	111	EOG0937133J	9606:000215	Q9UNX3	RPL26L1	ENSG00000037241	60S ribosomal protein L26-like 1
C672783	194	111	EOG0937133J	9606:000215	Q9UNX3	RPL26L1	ENSG00000037241	60S ribosomal protein L26-like 1
C678336	203.4	111	EOG0937133J	9606:000215	Q9UNX3	RPL26L1	ENSG00000037241	60S ribosomal protein L26-like 1
C466863	63	39	EOG093713HJ	9606:002c59	Q16595	FXN	ENSG00000165060	Friedreich ataxia protein
scaffold8359	105.2	90	EOG093713LY	9606:000e3c	A0A024RDJ3	GAR1	ENSG00000109534	GAR1 homolog, ribonucleoprotein
C657823	168.6	97	EOG09371431	9606:0000e5	P60866	RPS20	ENSG00000008988	40S ribosomal protein S20
C675709	181.3	97	EOG09371431	9606:0000e5	P60866	RPS20	ENSG00000008988	40S ribosomal protein S20
C677241	171.7	97	EOG09371431	9606:0000e5	P60866	RPS20	ENSG00000008988	40S ribosomal protein S20
scaffold11844	76.5	66	EOG093714JU	9606:002e50	Q9BTM9	URM1	ENSG00000167118	Ubiquitin-related modifier 1
scaffold11845	77.4	66	EOG093714JU	9606:002e50	Q9BTM9	URM1	ENSG00000167118	Ubiquitin-related modifier 1
scaffold11846	77.8	66	EOG093714JU	9606:002e50	Q9BTM9	URM1	ENSG00000167118	Ubiquitin-related modifier 1
scaffold17858	116.8	86	EOG093714Q2	9606:000dc7	Q9Y3C7	MED31	ENSG00000108590	Mediator complex subunit 31
C649883	86.1	76	EOG093715EC	9606:000bcf	O14737	PDCD5	ENSG00000105185	TF-1 cell apoptosis-related protein 19
scaffold3148	99.2	87	EOG093715EC	9606:000bcf	O14737	PDCD5	ENSG00000105185	TF-1 cell apoptosis-related protein 19
scaffold6644	122.1	78	EOG09371675	9606:001625	A8MT02	SNRPB	ENSG00000125835	small nuclear ribonucleoprotein polypeptides B and B1
scaffold6644	122.1	78	EOG09371675	9606:001770	P63162	SNRPN	ENSG00000128739	Sm protein D
scaffold5472	77.9	78	EOG0937167R	9606:0037dd	E9PSH4	MAF1	ENSG00000179632	MAF1 homolog, negative regulator of RNA polymerase III
scaffold5472	77.9	78	EOG0937167R	9606:003850	I3L0F9	TPRXL	ENSG00000180438	tetra-peptide repeat homeobox-like
scaffold15293	208.2	214	EOG093716T7	9606:00459e	D6W601	ADAT3	ENSG00000213638	adenosine deaminase, tRNA-specific 3
C618281	101.4	51	EOG093717LU	9606:0036bb	P62875	POLR2L	ENSG00000177700	DNA-directed RNA polymerase III subunit L
C626721	98.7	51	EOG093717LU	9606:0036bb	P62875	POLR2L	ENSG00000177700	DNA-directed RNA polymerase III subunit L
C693148	97.6	58	EOG093717LU	9606:0036bb	P62875	POLR2L	ENSG00000177700	DNA-directed RNA polymerase III subunit L
scaffold18756	86.5	82	EOG0937183G	9606:0010d8	X6R2S6	SPCS1	ENSG00000114902	Transmembrane:Helical
scaffold6505	98.9	105	EOG0937186Q	9606:003d96	Q9HBM6	TAF9B	ENSG00000187325	Neuronal cell death-related protein 7
scaffold6505	98.9	105	EOG0937186Q	9606:004f5f	\N	TAF9	ENSG00000273841	TAF9 RNA polymerase II, TATA box binding protein (TBP)-associated factor, 32kDa
scaffold6505	98.9	105	EOG0937186Q	9606:0051bd	Q16594	TAF9	ENSG00000276463	RNA polymerase II TBP-associated factor subunit G
scaffold6506	99.3	105	EOG0937186Q	9606:003d96	Q9HBM6	TAF9B	ENSG00000187325	Neuronal cell death-related protein 7
scaffold6506	99.3	105	EOG0937186Q	9606:004f5f	\N	TAF9	ENSG00000273841	TAF9 RNA polymerase II, TATA box binding protein (TBP)-associated factor, 32kDa
scaffold6506	99.3	105	EOG0937186Q	9606:0051bd	Q16594	TAF9	ENSG00000276463	RNA polymerase II TBP-associated factor subunit G
C656717	121.3	77	EOG093718E9	9606:0018f1	O43678	NDUFA2	ENSG00000131495	Complex I-B8
scaffold19972	115.6	77	EOG093718E9	9606:0018f1	O43678	NDUFA2	ENSG00000131495	Complex I-B8
scaffold8741	75.3	65	EOG093718EG	9606:001ad9	P62072	TIMM10	ENSG00000134809	Mitochondrial import inner membrane translocase subunit Tim10
C717299	117	118	EOG0937192A	9606:002337	P78346	RPP30	ENSG00000148688	RNase P subunit 2
C710147	133.8	101	EOG093719IK	9606:00431d	O15212	PFDN6	ENSG00000204220	Protein Ke2
C710147	133.8	101	EOG093719IK	9606:0044b0	O15212	PFDN6	ENSG00000206283	Protein Ke2
C710147	133.8	101	EOG093719IK	9606:004734	O15212	PFDN6	ENSG00000224782	Protein Ke2
C710147	133.8	101	EOG093719IK	9606:004a02	O15212	PFDN6	ENSG00000235692	Protein Ke2
C710147	133.8	101	EOG093719IK	9606:004a82	O15212	PFDN6	ENSG00000237335	Protein Ke2
C526565	55.2	54	EOG093719M8	9606:00324c	E5RHG6	TBCA	ENSG00000171530	tubulin folding cofactor A
C695684	77.5	96	EOG09371BIR	9606:00097b	Q9NQP4	PFDN4	ENSG00000101132	Protein C-1
