# Supplementary material for: De novo assembly and comparative transcriptome characterization of Poecilobdella javanica provide insight into blood feeding of medicinal leeches
Source: Royal Society of Chemistry journal article supplement (doi:10.1039/c8mo00098k), 2018-09-13
Supplement: c8mo00098k3.xlsx [file c8mo00098k3.xlsx]

## Sheet: Supplemental Table S2
Supplemental Table S2. Gene expression profiles of Poecilobdella javanica during blood feeding.
Transcripts	Day_0_1	Day_0_2	Day_1_1	Day_10_1	Day_10_2	Day_20_1	Day_20_2	Day_30_1
C539749	4.23094	4.28696	3.04507	0	3.09974	0	2.00874	2.72956
C539779	0	0	0	0	0	0	0	4.03977
C539825	0	5.55485	0	0	0	0	0	0
C539867	0	3.11822	0	0	0	0	0	0
C539909	1053.04	1000.36	3786.14	2253.03	1617.24	4102.3	2991.11	1563.78
C540001	0	0	0	0	0	14.4872	0	12.8607
C540081	3.16893	0	0	0	0	0	0	0
C540169	0	0	0	0	6.85175	0	0	6.75974
C540177	0	0	0	0	0	0	0	6.47918
C540179	0	16.8322	0	0	0	0	0	0
C540199	2776.45	934.981	621.018	3176.2	1297.94	3882.32	2686.89	3504.69
C540217	0	3.10532	0	0	0	0	0	0
C540279	3.79911	0	0	0	0	0	0	0
C540319	8.43495	7.85414	0	0	0	0	0	0
C540327	0	0	0	0	3.54766	3.81126	0	0
C540435	443.758	289.787	1631.29	389.668	1398.07	946.187	714.272	508.321
C540475	0	0	0	0	0	0	2.39278	0
C540555	0	0	0	0	0	0	3.29605	0
C540581	0	0	0	0	0	0	2.77972	0
C540603	0	0	0	5.46359	0	0	0	0
C540605	0	0	0	0	0	0	2.81531	0
C540611	0	0	0	0	0	3.27234	0	0
C540635	0	0	0	0	0	0	0	2.7229
C540653	0	0	0	0	0	0	0	2.7021
C540661	0	0	0	0	0	0	3.34102	0
C540673	0	0	1.93121	0	0	0	0	0
C540677	0	6.69719	0	0	0	0	0	0
C540679	0	0	0	0	0	3.35973	0	0
C540683	4.793	0	0	0	0	0	0	0
C540703	0	3.05092	0	0	0	0	0	0
C540713	0	0	4.94202	0	0	0	0	0
C540769	0	0	10.4763	0	8.61212	0	0	0
C540771	0	3.0591	0	0	0	0	0	0
C540829	0	0	0	3.69552	0	0	0	0
C540961	0	0	7.42478	6.25291	0	3.57756	2.65265	0
C540971	0	0	0	0	0	0	2.78255	0
C540973	0	0	0	0	0	7.93408	0	0
C540981	0	0	0	0	0	3.93723	0	0
C540995	0	0	0	0	3.7421	0	0	0
C541001	0	0	0	0	0	0	2.85101	0
C541007	0	5.51487	0	0	0	0	0	0
C541041	0	5.79366	5.97478	3.58686	0	0	3.2492	0
C541089	0	0	0	0	0	0	0	6.68824
C541091	0	3.02558	0	0	0	0	0	0
C541101	0	6.02394	0	0	0	0	0	0
C541155	0	0	0	0	0	0	2.38099	0
C541191	0	0	0	0	3.20446	0	0	0
C541221	0	0	0	0	0	0	0	2.73247
C541259	0	3.10034	0	0	0	0	0	0
C541263	0	5.54557	0	0	0	0	0	0
C541275	0	0	2.72468	4.67969	6.02204	2.57975	4.62667	2.34421
C541281	0	0	2.57331	0	0	0	0	0
C541299	0	9.07575	0	0	0	0	0	0
C541317	1908.94	3189.74	1348.91	1216.74	506.521	1325	1602.24	2184.65
C541355	0	3.63248	0	0	0	0	0	0
C541417	0	0	0	0	0	0	3.7134	0
C541427	0	4.02065	0	0	0	0	0	0
C541437	2.71901	0	0	0	0	0	0	0
C541483	0	9.02	0	0	0	0	0	4.72383
C541495	0	0	0	0	0	0	2.82272	0
C541499	0	0	0	0	0	0	0	3.2183
C541519	0	66.4282	0	17.0971	7.88297	23.4669	24.0867	8.88542
C541541	0	0	0	0	0	0	2.38099	0
C541557	0	0	0	3.55383	0	0	0	0
C541581	0	37.0471	0	0	0	0	0	0
C541617	3.72396	0	15.1552	0	5.77356	4.27391	0	2.72787
C541621	0	3.09003	0	0	0	0	0	0
C541625	4.54072	0	0	7.36164	8.64339	6.74628	7.74118	8.65189
C541631	0	0	6.44508	0	0	0	0	0
C541647	0	0	0	0	0	0	2.80145	0
C541651	4.2702	0	0	0	0	2.83034	0	0
C541683	0	0	0	0	0	0	1.42186	0
C541713	0	0	0	0	0	0	2.85339	0
C541745	0	0	0	2.38617	0	0	0	0
C541751	0	0	0	0	0	0	2.792	0
C541769	0	10.6314	0	0	0	0	0	0
C541777	0	0	0	0	0	0	0	2.31649
C541887	0	2.98769	0	0	0	0	0	0
C541891	0	0	0	0	0	0	3.19347	0
C541913	3.13249	3.9831	0	6.91891	0	5.6879	0	0
C541919	0	3.49704	0	0	0	0	0	0
C542129	0	0	0	0	0	6.60665	0	0
C542145	0	0	0	0	0	0	2.86748	0
C542165	0	0	0	0	0	0	12.1847	0
C542187	0	0	0	0	0	3.66342	0	0
C542189	7.37497	6.92924	0	0	0	0	5.11642	0
C542241	0	0	0	0	0	0	3.28024	0
C542263	0	0	0	0	0	0	2.7313	0
C542269	0	0	0	0	0	0	2.82532	0
C542303	0	4.63159	0	0	0	0	0	0
C542329	0	0	0	0	0	0	0	2.72822
C542415	0	0	3.07386	0	0	0	0	0
C542463	0	0	3.03069	0	0	0	0	0
C542475	0	0	0	0	0	0	2.7172	0
C542485	0	0	0	0	0	0	0	3.06364
C542495	0	0	3.04846	0	0	0	0	0
C542601	0	3.49704	7.98844	7.78806	0	0	0	0
C542617	0	0	0	0	0	2.89898	0	0
C542619	0	4.49631	0	0	0	0	0	0
C542625	0	0	0	0	0	0	3.66009	0
C542645	0	8.94852	0	0	0	0	0	0
C542665	0	3.10053	0	0	0	0	0	0
C542735	0	0	0	0	0	2.85318	0	0
C542767	0	0	3.46156	0	0	0	0	0
C542771	0	0	0	6.47217	0	6.22404	0	0
C542829	0	22.8053	0	0	0	0	0	0
C542845	0	10.3766	0	0	0	0	0	0
C542847	0	0	0	0	0	0	0	3.49248
C542853	0	0	0	0	0	0	2.82532	0
C542911	0	0	0	0	0	0	2.85101	0
C542917	4.24127	10.1156	8.82167	0	7.27961	5.65914	2.75714	0
C542925	0	3.02302	0	0	0	0	0	0
C542985	0	5.92758	0	0	0	0	0	0
C542991	0	0	11.4743	0	0	0	0	0
C543017	0	0	0	0	0	0	3.62828	0
C543049	0	3.50039	0	0	0	0	0	0
C543091	0	319.471	414.34	314.46	303.155	549.772	421.958	0
C543117	0	0	0	0	0	0	0	4.9153
C543145	0	0	20.6597	6.46877	20.2515	0	0	13.4156
C543153	0	0	0	0	0	0	4.15931	0
C543161	0	4.77163	0	0	0	0	0	4.37806
C543223	13.266	11.7234	0	13.5556	3.17797	0	0	10.6579
C543245	0	0	0	0	0	0	0	2.6216
C543283	0	3.58186	0	0	0	0	0	0
C543343	0	0	3.23289	0	0	0	0	0
C543365	0	3.536	0	0	0	0	0	0
C543373	0	0	0	0	0	0	2.76476	0
C543385	0	0	0	2.78717	0	0	0	0
C543435	0	0	0	0	0	0	4.1523	0
C543471	0	0	4.4877	0	0	0	0	0
C543483	0	0	0	0	3.41456	0	0	0
C543491	0	0	2.82377	0	0	0	0	0
C543495	10.8037	5.12561	0	0	0	0	0	0
C543501	0	0	0	0	0	0	3.73043	0
C543515	0	0	0	0	3.11803	0	0	0
C543533	0	4.91636	7.92999	0	6.6744	2.73137	0	0
C543551	0	10.4698	0	0	0	0	0	0
C543597	0	0	0	0	0	6.00767	2.75775	0
C543637	0	0	0	0	0	0	3.6166	0
C543649	0	0	0	0	0	2.89921	0	0
C543679	0	14.8024	0	0	0	0	0	0
C543687	0	0	0	74.2047	0	0	83.5889	0
C543697	0	0	0	0	0	0	0	3.59128
C543719	116.904	141.184	106.033	154.699	216.975	233.588	263.951	200.067
C543751	0	0	0	0	0	3.83937	0	0
C543757	0	0	0	0	0	0	0	2.68305
C543831	0	3.00884	0	0	0	0	0	0
C543859	107.601	425.6	67.272	101.201	71.9961	0	96.4524	140.493
C543923	3.03439	0	7.92254	0	6.59887	0	3.25495	0
C543955	0	0	0	5.84666	0	0	0	3.18601
C543983	0	4.58371	0	0	0	0	0	0
C544053	0	0	11.1643	5.51332	4.21133	7.5564	4.09753	0
C544065	0	0	0	0	0	0	4.0257	0
C544153	0	0	3.38286	0	3.00348	0	0	0
C544175	0	0	0	0	0	0	3.25078	0
C544225	0	9.46502	0	15.1513	0	0	4.75675	0
C544235	0	0	0	0	3.13169	0	0	0
C544243	3.78877	0	0	0	0	4.58554	0	0
C544259	0	0	0	0	0	7.96856	0	0
C544325	0	5.55872	0	0	0	0	0	0
C544361	0	2.79455	0	0	0	0	0	0
C544387	0	4.04586	0	0	0	0	0	0
C544405	0	0	0	0	0	0	2.60005	3.85306
C544429	0	0	0	0	0	2.86607	0	0
C544447	0	0	0	0	0	0	3.26472	0
C544479	0	3.02979	0	0	0	0	0	0
C544493	0	3.05011	0	0	0	0	0	0
C544497	0	0	4.1022	0	0	2.45555	0	0
C544509	0	0	0	0	0	3.34467	0	0
C544521	0	0	3.04402	0	0	0	0	0
C544587	0	0	3.00629	0	0	0	0	0
C544589	0	6.05063	0	0	0	0	0	0
C544605	0	0	0	0	0	0	0	3.62359
C544611	0	0	0	0	0	0	4.07202	0
C544633	0	0	0	29.9745	0	0	0	0
C544649	0	3.06535	0	0	0	0	0	0
C544693	0	0	0	0	0	0	3.20668	0
C544781	0	6.08558	0	0	0	0	0	0
C544807	0	0	0	0	0	3.29942	0	0
C544809	0	0	0	0	0	0	2.74668	0
C544817	0	4.85218	0	0	0	0	0	0
C544823	0	0	0	0	0	3.41073	0	0
C544833	0	0	0	3.02613	0	2.35494	3.94377	0
C544835	0	11.7425	0	0	0	0	0	0
C544837	0	4.46554	0	0	0	0	0	0
C544853	0	0	0	3.1415	0	3.10662	0	0
C544859	0	3.95717	0	0	0	0	0	0
C544865	0	0	0	0	0	0	0	3.07916
C544945	0	0	0	0	3.43654	0	0	0
C544955	0	0	0	0	0	0	5.39061	0
C544971	0	0	0	2.67365	0	0	0	0
C544997	3.08613	2.90789	0	0	0	0	0	0
C545093	0	0	0	0	0	0	0	3.0159
C545135	0	4.96588	0	0	0	0	0	4.51159
C545155	0	0	0	0	0	0	3.68732	0
C545199	0	0	0	0	0	0	0	2.69093
C545209	0	3.40865	0	0	0	0	6.04419	0
C545273	0	0	2.8716	0	0	0	0	0
C545297	0	0	3.29911	0	0	0	0	0
C545305	0	0	0	0	0	0	2.68015	0
C545327	0	0	3.84608	0	0	0	0	0
C545363	0	4.92697	0	0	0	0	0	0
C545365	0	0	0	0	3.60244	0	0	0
C545379	0	0	0	0	0	0	3.21133	0
C545419	0	0	3.02052	2.6674	0	2.79997	0	0
C545425	0	0	0	0	0	0	0	3.10928
C545499	0	0	0	0	2.3364	0	0	0
C545501	0	0	11.9596	19.3735	0	0	0	13.0869
C545525	0	22.686	6.83996	19.7699	13.9228	29.1192	15.4241	23.4728
C545551	0	0	2.8841	0	0	0	0	0
C545577	0	0	0	6.81764	0	5.06153	5.57546	0
C545595	0	0	0	0	0	0	2.74902	0
C545613	0	0	0	0	0	0	3.19811	0
C545629	594.826	649.44	85.6313	749.757	110.33	1099.6	1130.15	472.16
C545677	0	0	0	0	0	4.1192	3.23974	0
C545699	150.09	2931.18	0	580.167	0	788.255	667.145	963.147
C545701	0	0	0	0	0	0	0	3.1722
C545735	0	0	0	0	0	0	3.61409	0
C545749	0	0	0	0	0	0	2.80291	0
C545779	0	0	0	0	0	0	0	3.05533
C545839	0	0	2.99177	0	0	0	0	0
C545869	0	2.97472	0	0	0	0	0	0
C545899	0	5.46182	0	0	0	0	0	0
C545963	0	0	2.97924	0	0	0	0	0
C546147	0	0	0	0	3.57127	3.88409	3.61642	5.23508
C546161	0	0	0	3.16049	0	4.736	2.03447	0
C546169	0	5.44175	0	0	0	0	0	0
C546181	3.08444	0	0	0	0	0	0	0
C546261	0	4.03464	0	0	0	0	0	0
C546281	0	0	0	0	0	0	6.31915	3.71843
C546325	0	27.157	0	0	4.77588	0	0	10.0895
C546353	0	5.51566	0	0	0	0	0	0
C546433	0	0	0	0	0	3.16166	0	0
C546455	0	3.51776	0	0	0	0	0	0
C546475	0	0	0	0	0	4.2171	2.71337	0
C546499	0	4.01208	0	0	0	0	0	0
C546531	0	0	0	0	0	11.3024	0	0
C546547	0	6.45366	0	0	0	0	0	0
C546551	0	0	0	0	0	0	3.24032	0
C546559	0	7.14846	0	0	0	0	0	0
C546597	0	0	0	0	0	0	2.78712	0
C546599	0	3.98446	0	0	0	0	0	0
C546609	0	4.97348	0	0	0	0	0	0
C546613	0	3.38981	0	0	0	0	0	0
C546639	0	0	8.94448	0	0	0	0	0
C546641	3.04423	0	0	0	0	0	0	0
C546649	9.20186	0	11.2083	0	3.09379	8.5634	0	0
C546669	0	0	0	0	0	0	3.24793	0
C546675	0	0	0	0	0	0	0	4.5431
C546687	0	0	0	9.9013	0	0	0	0
C546699	0	0	0	0	0	0	0	3.53291
C546711	0	0	0	0	0	2.72034	0	0
C546723	0	0	0	0	0	0	2.73642	0
C546735	0	0	0	0	2.99791	0	0	0
C546737	0	0	0	0	0	2.93978	3.67961	0
C546745	0	0	0	0	0	3.32742	0	0
C546773	0	0	0	0	0	0	5.52815	0
C546777	0	0	0	0	48.2451	0	0	0
C546781	0	13.6789	0	0	0	0	0	0
C546821	10.1729	13.0952	6.71858	4.01884	10.2696	4.19496	10.2779	15.1705
C546873	0	0	3.0023	0	0	0	0	0
C546885	0	0	0	0	0	0	2.75255	0
C546891	0	0	0	0	0	0	5.17466	0
C546893	4.55323	0	0	0	6.93833	0	0	3.45459
C546923	3.06961	8.05682	3.758	0	0	3.62615	3.72807	0
C546933	0	0	0	0	0	0	2.78483	0
C546953	782.94	494.196	674.294	751.974	824.539	662.94	732.477	874.721
C546957	0	9.733	0	3.1252	0	0	6.63152	8.70645
C546961	0	0	0	0	6.44053	0	0	0
C546967	0	47.4788	0	0	0	0	6.59251	11.2595
C546987	0	3.56609	0	0	0	0	0	0
C546989	0	0	0	50.596	0	0	0	0
C546993	0	0	0	0	0	0	2.7756	0
C547003	0	0	0	0	14.9802	0	0	10.8549
C547025	3.14068	0	0	0	0	0	0	0
C547039	0	0	0	0	0	6.1251	0	0
C547055	0	0	0	0	0	0	3.37599	0
C547071	0	2.95539	0	0	0	0	0	0
C547091	0	4.44785	0	0	0	0	6.25291	0
C547111	0	0	3.39516	0	0	0	0	0
C547135	0	3.5789	0	0	0	0	0	0
C547143	0	0	0	0	10.5468	0	0	2.72409
C547167	0	0	0	0	6.16563	4.82164	4.05373	0
C547169	0	0	0	0	0	0	2.79175	0
C547193	0	4.9084	0	0	0	0	0	0
C547195	0	4.10078	0	0	0	2.77233	0	0
C547209	0	0	0	0	0	2.73452	0	0
C547307	10855.2	6356.73	2613.61	11415.1	5657.65	16249.1	10056.8	13366.6
C547369	3.02611	0	0	0	0	0	0	0
C547375	0	3.99293	0	0	0	0	0	0
C547407	0	5.17635	0	0	0	0	0	0
C547409	0	4.11613	0	0	0	0	0	0
C547435	0	0	0	0	0	0	168.372	179.947
C547469	0	0	2.93586	0	0	0	0	0
C547499	31.8333	36.7209	0	12.3526	41.8699	37.1568	25.2278	64.344
C547557	26.0656	47.6321	10.3476	35.7073	13.1685	37.8329	25.6821	29.7594
C547559	0	2.93873	0	0	0	0	0	0
C547567	0	0	6.04079	3.63098	0	0	0	0
C547579	0	0	3.8366	0	0	0	0	0
C547583	0	0	3.00033	0	0	0	0	0
C547615	5.15474	3.88805	0	0	0	0	0	0
C547623	0	0	0	2.58668	0	0	0	0
C547635	0	0	0	0	0	0	5.41858	0
C547699	0	0	0	0	0	0	0	2.62278
C547729	0	0	4.38	0	0	0	0	0
C547747	0	0	2.58863	0	0	0	0	0
C547749	0	2.94125	0	0	0	0	0	0
C547789	0	0	0	0	0	2.74496	0	0
C547833	0	0	0	0	0	0	4.95849	3.98291
C547837	0	15.7473	0	0	0	0	0	0
C547839	0	22.7261	0	0	0	0	0	0
C547851	0	0	0	0	0	0	0	2.69865
C547897	9.63869	0	0	0	0	0	20.8904	0
C547909	0	0	0	0	0	3.26393	0	0
C547993	0	0	0	0	0	0	2.77609	0
C547999	0	4.02289	0	0	0	0	0	0
C548005	0	0	0	0	0	0	2.73938	0
C548011	0	0	0	0	0	0	0	3.09296
C548019	0	0	0	0	0	0	0	2.69421
C548047	0	0	0	0	0	0	3.14931	0
C548083	0	0	0	0	0	0	2.75545	0
C548151	0	0	0	0	0	3.29209	0	0
C548159	0	0	0	0	3.62976	0	0	0
C548171	4.64106	0	0	0	0	0	0	0
C548187	0	0	0	0	0	0	3.2472	0
C548215	0	0	4.73535	0	0	0	0	0
C548221	0	0	0	0	0	0	4.08923	6.8889
C548229	0	0	0	0	0	2.69555	0	0
C548235	0	0	4.049	0	3.01969	0	0	0
C548249	0	0	0	0	0	0	2.67973	0
C548251	0	0	0	0	0	0	0	3.81848
C548293	0	14.8511	0	0	0	0	0	0
C548313	0	0	0	0	0	0	2.7583	0
C548325	18.5914	25.7899	14.8704	11.796	0	0	14.6412	0
C548339	0	0	4.45501	0	0	0	0	0
C548369	0	0	0	0	0	0	0	4.70664
C548395	0	0	3.43432	2.7531	6.44839	0	0	0
C548409	0	0	0	0	0	0	3.21406	0
C548417	0	2.95215	0	0	0	0	0	0
C548429	3.59493	4.5634	0	0	0	0	0	0
C548445	4.13862	0	2.79603	0	5.84691	0	8.40799	0
C548447	0	3.43714	0	0	0	0	0	0
C548459	0	0	0	0	0	0	0	4.7352
C548471	0	3.00944	0	0	0	0	0	0
C548491	0	2.95215	0	0	0	0	0	0
C548497	0	0	0	0	0	0	3.21406	0
C548519	0	2.98205	4.7203	0	8.4659	6.82737	4.99852	0
C548521	0	0	0	0	0	3.76448	0	0
C548533	0	0	0	0	7.28195	0	0	2.70949
C548565	5.73397	0	0	0	0	0	0	0
C548581	0	0	0	0	0	0	2.6921	0
C548605	0	0	4.815	0	0	0	6.14866	4.37083
C548615	0	2.95215	0	0	0	0	0	0
C548621	0	0	0	0	0	0	2.75147	0
C548627	0	3.01442	0	0	0	0	0	0
C548661	0	0	0	0	0	0	2.64186	0
C548679	0	0	2.98604	0	0	0	0	0
C548723	0	0	4.93657	0	0	0	0	0
C548735	0	0	0	2.72081	0	0	0	0
C548767	0	0	0	0	0	3.61737	0	0
C548777	0	0	5.10343	0	4.98306	4.64538	5.39297	0
C548783	0	0	0	0	0	0	0	2.52143
C548787	0	3.27311	0	0	0	0	0	0
C548791	0	4.51293	0	0	0	0	0	0
C548851	0	0	0	0	0	0	0	2.62583
C548859	0	0	0	0	0	0	3.18672	0
C548893	0	0	0	0	0	0	3.21797	0
C548897	0	0	11.4055	0	0	0	0	0
C548909	0	0	5.8751	0	5.08012	0	0	0
C548963	0	0	2.4896	0	0	0	0	0
C549009	0	28.274	0	0	0	0	0	0
C549035	39.4163	108.625	26.7467	24.3965	29.9175	40.5954	40.7748	35.0855
C549069	5.75482	0	0	8.84858	0	0	0	0
C549087	0	0	2.95891	0	0	0	0	0
C549095	0	0	3.90944	0	0	0	0	0
C549105	15.2088	8.5863	20.4248	0	11.2562	6.27358	4.08585	3.11299
C549137	0	0	0	0	0	0	2.76187	0
C549151	0	5.03988	0	0	0	0	0	0
C549195	0	0	0	0	0	0	0	3.12923
C549213	0	6.83199	0	0	0	0	0	0
C549217	0	2.79519	0	0	0	0	0	0
C549237	31.1047	12.4459	26.1928	27.7287	22.6344	21.7475	25.2393	26.7925
C549249	0	0	0	3.15716	3.11631	0	0	0
C549283	3.23963	0	3.35289	0	0	0	0	0
C549311	0	0	0	0	0	0	2.64979	0
C549315	0	2.92824	0	0	0	0	0	0
C549383	0	0	0	0	0	0	0	2.67751
C549389	0	4.33063	0	0	0	3.18889	5.29539	11.4657
C549407	0	3.52717	0	0	0	0	0	0
C549423	0	0	0	3.19673	0	0	0	0
C549425	0	6.34066	0	0	0	0	0	0
C549427	0	0	0	0	0	0	0	2.61561
C549463	0	0	4.19697	0	0	0	0	0
C549467	0	0	0	0	0	0	5.28409	0
C549507	11.6507	2.90841	21.9571	0	0	0	0	0
C549517	2.97406	0	0	0	0	0	0	0
C549519	0	0	0	0	0	0	2.71342	0
C549527	0	5.37873	0	0	0	0	0	0
C549529	0	0	0	0	0	0	4.40432	0
C549541	0	0	3.32497	0	0	0	0	0
C549547	0	0	0	0	0	0	3.19886	0
C549549	0	0	3.40091	0	0	0	0	0
C549553	0	3.86613	0	0	0	0	0	0
C549573	3.22345	0	0	0	0	0	0	0
C549575	0	0	0	0	0	0	2.61797	0
C549579	0	3.01516	0	0	0	0	2.66342	0
C549633	0	0	4.21405	0	0	0	0	0
C549637	0	0	0	0	4.21231	0	0	0
C549643	0	0	2.8319	0	0	0	0	0
C549687	0	0	0	0	0	3.23073	0	0
C549713	3.57019	13.9952	0	0	10.1414	10.086	8.86641	0
C549739	4.59473	0	0	0	0	0	0	0
C549743	0	0	0	0	0	9.59926	0	0
C549747	12.6985	12.4903	19.7253	15.265	21.9599	12.5448	20.6866	12.2233
C549751	8.21292	0	0	0	0	0	0	0
C549759	0	12.7564	0	0	0	0	0	0
C549771	0	0	0	0	3.83753	0	0	0
C549773	0	0	0	0	0	0	0	2.65098
C549797	0	0	0	0	0	0	6.72038	0
C549829	0	3.87104	0	0	0	0	0	0
C549831	0	0	0	0	0	2.78807	0	0
C549849	0	0	0	0	0	0	0	12.3138
C549861	0	2.97288	0	0	0	0	0	0
C549863	0	0	0	0	0	0	3.58431	0
C549869	2.10947	0	0	0	0	0	0	0
C549893	0	0	0	0	0	0	3.22695	0
C549895	0	0	0	0	0	0	2.7157	0
C549931	0	0	2.82452	0	0	0	0	0
C549939	0	0	0	0	3.9777	0	0	0
C549953	0	5.60626	0	5.67774	0	5.22764	0	0
C549967	0	5.37381	0	0	0	0	0	0
C549979	0	30.8711	3.42102	0	2.91955	0	7.09981	10.9997
C549983	0	3.1158	0	0	0	0	0	0
C550001	0	4.41946	0	0	0	0	0	0
C550021	0	0	0	0	4.8833	0	0	0
C550023	0	0	0	7.40099	0	7.28343	0	0
C550027	0	0	0	0	0	0	3.20115	0
C550065	0	3.3244	0	0	0	0	0	0
C550097	0	3.09027	0	0	0	0	0	0
C550105	3.60643	0	0	0	0	0	0	0
C550113	0	0	0	0	0	0	0	5.32187
C550171	0	0	0	0	0	0	4.39668	0
C550195	0	0	0	0	3.97965	2.8302	0	0
C550245	0	0	0	0	0	0	0	3.99593
C550249	0	0	0	0	0	0	0	6.47717
C550253	0	0	0	0	0	0	2.74297	0
C550267	0	0	0	0	0	0	2.9699	0
C550275	0	0	0	0	0	0	3.12181	0
C550283	0	0	0	0	0	0	3.31993	0
C550287	0	0	0	0	0	0	2.74749	0
C550295	0	0	0	0	0	0	2.65205	0
C550329	0	5.8068	0	0	0	0	0	0
C550343	0	0	0	0	5.06053	2.82372	3.12191	0
C550371	4.05844	6.97175	0	4.14532	0	0	0	0
C550397	0	2.86014	0	0	0	0	0	0
C550411	0	0	0	0	0	0	4.05189	0
C550421	3.05819	0	0	0	0	0	0	0
C550429	0	4.74256	3.79461	0	0	0	6.92816	5.2112
C550441	0	0	3.83363	0	0	0	0	0
C550449	0	0	2.96033	0	0	0	0	0
C550461	6.15733	0	0	0	0	7.75549	0	0
C550467	0	4.7573	6.76254	3.18456	0	3.81007	4.56542	0
C550505	0	0	0	0	0	0	3.21434	0
C550531	0	0	3.82876	0	0	0	0	0
C550551	0	0	0	0	0	0	3.18381	0
C550607	12.9473	6.99694	6.53733	10.4386	13.3848	42.3946	5.36941	7.8257
C550631	0	3.92916	0	0	0	0	0	0
C550655	0	0	0	0	0	0	0	3.08661
C550657	0	0	0	0	5.02737	4.45407	0	0
C550659	0	6.86453	0	0	0	0	0	0
C550717	0	0	0	0	0	2.79654	0	0
C550727	0	0	0	0	0	3.08365	6.84096	0
C550763	0	2.87495	0	0	0	0	0	0
C550765	0	0	0	0	0	0	2.7687	0
C550767	0	0	0	0	0	0	5.02334	0
C550799	0	8.61352	0	0	0	4.67922	8.01066	0
C550811	3.53793	0	0	0	0	0	0	0
C550813	0	3.84053	0	0	0	7.52204	4.2387	0
C550819	0	0	0	0	0	0	0	2.65028
C550869	0	0	2.83285	0	9.20404	0	0	0
C550871	0	11.4028	0	0	0	0	2.72969	0
C550887	0	0	0	0	0	0	2.73681	0
C550889	0	0	0	0	3.99194	0	0	0
C550901	4.15246	0	4.32324	0	0	0	0	0
C550931	0	0	0	0	0	0	0	3.45764
C550963	0	0	0	0	0	0	0	2.69026
C550967	0	2.88976	0	0	0	0	0	0
C550975	0	5.01034	0	0	0	3.32617	0	0
C550985	0	4.86536	0	3.48927	0	0	5.57369	0
C551001	0	0	0	2.74837	0	2.75713	0	0
C551005	0	0	0	0	0	0	2.73456	0
C551011	0	0	0	0	0	4.10789	0	0
C551023	0	0	2.95787	0	0	0	0	0
C551033	0	0	3.45566	0	0	0	0	0
C551039	0	0	0	0	0	3.69469	0	0
C551077	0	2.91195	0	0	0	0	0	0
C551081	0	0	4.89008	0	0	0	0	0
C551091	0	3.4614	0	0	0	0	0	0
C551097	0	0	2.87965	0	0	0	0	0
C551099	0	0	0	0	0	0	0	3.00098
C551127	572.669	292.618	771.765	304.235	814.419	0	371.692	474.477
C551129	0	2.87247	0	0	0	0	0	0
C551141	0	5.43289	0	0	0	0	0	0
C551155	0	0	0	0	0	0	2.678	0
C551171	0	0	0	0	0	0	0	2.97245
C551249	4.23878	0	0	0	5.97954	7.66425	8.69204	0
C551255	5.6393	0	3.03183	0	4.99195	0	0	0
C551259	0	0	0	0	0	0	2.73681	0
C551273	0	0	0	0	0	4.02248	2.74003	0
C551293	0	0	0	2.62717	0	0	0	0
C551299	0	0	0	2.63849	0	0	0	0
C551303	0	0	5.77399	0	4.26647	7.39413	0	5.09092
C551341	0	0	0	0	3.99449	0	0	0
C551359	0	0	0	0	0	0	0	3.47299
C551365	0	0	0	0	0	3.38668	0	0
C551375	0	0	0	0	0	0	3.62608	0
C551383	3.06184	0	0	0	0	0	0	0
C551387	0	0	2.88804	0	0	0	0	0
C551423	0	12.3158	0	0	0	0	0	0
C551427	0	5.02152	0	0	0	0	0	0
C551431	0	0	7.38633	0	0	0	0	2.95416
C551449	0	0	0	0	0	3.27178	0	0
C551481	0	3.3349	0	0	0	0	0	0
C551507	497.627	316.411	107.934	1432.59	161.452	1082.2	1045.13	1093.41
C551519	4.07534	0	0	0	0	0	0	0
C551553	0	0	0	0	0	0	2.72396	0
C551587	0	0	0	0	0	0	2.72396	0
C551603	0	0	3.85696	0	0	0	0	0
C551627	0	0	0	0	0	0	0	3.43707
C551629	0	0	0	0	0	0	2.57088	0
C551671	0	4.43802	0	0	0	0	0	0
C551703	0	0	0	0	0	0	2.71946	0
C551705	0	6.75122	0	0	0	0	0	0
C551717	0	2.97208	0	0	0	0	0	0
C551723	0	0	0	0	0	0	2.68794	0
C551795	0	0	0	0	0	0	3.903	0
C551819	0	0	0	0	4.42716	0	0	0
C551831	0	0	0	0	0	0	2.64518	0
C551835	2.96412	0	0	0	0	0	0	0
C551841	0	0	0	0	0	0	2.64067	0
C551847	11.2282	5.59932	11.7629	3.47293	3.02877	6.70732	4.45644	0
C551859	0	3.36149	0	0	0	6.90355	0	4.35166
C551893	0	0	0	0	0	0	3.54172	0
C551897	0	4.33659	0	0	0	0	0	0
C551905	0	0	9.12614	0	0	3.20983	0	0
C551919	4.08677	0	0	0	0	0	0	0
C551929	0	0	0	0	0	0	0	6.43653
C551931	0	9.10872	0	0	0	0	0	0
C551935	0	4.4075	0	0	0	0	0	0
C551967	0	0	0	0	12.5524	0	14.1426	8.32244
C551969	0	5.49568	0	0	0	0	0	0
C551979	6.03927	0	0	0	0	0	0	0
C551981	0	0	0	0	0	2.79496	0	0
C552003	0	26.5543	0	0	0	0	0	0
C552015	77.6561	41.7584	38.416	63.2542	44.9814	67.2045	86.4923	65.7198
C552025	0	0	0	0	0	0	2.59339	0
C552033	66.3884	33.2568	165.101	43.0889	847.147	65.7589	59.1355	35.0716
C552069	0	5.77973	0	0	0	0	0	0
C552075	0	2.95479	0	0	0	0	0	0
C552107	0	2.93911	0	0	0	0	0	0
C552109	0	0	0	2.80518	0	0	0	0
C552117	0	3.90833	0	0	0	0	0	0
C552161	0	0	0	0	0	0	0	3.60839
C552183	0	4.12834	0	0	0	3.58729	0	0
C552185	0	0	4.35871	0	0	0	0	0
C552211	0	0	4.33934	0	0	0	0	0
C552215	0	4.74727	0	0	0	0	0	0
C552217	0	0	0	0	0	3.08534	0	0
C552239	0	0	0	0	0	0	2.73938	0
C552241	0	11.6742	0	0	0	0	0	0
C552271	0	0	4.05837	0	2.96044	0	0	0
C552275	0	0	2.92452	0	0	0	0	0
C552373	0	0	3.85211	0	0	0	0	0
C552403	0	0	0	0	0	0	2.57538	0
C552421	0	3.90342	0	0	0	0	0	0
C552431	0	5.05272	0	0	0	0	0	0
C552437	4.04198	0	0	0	0	0	0	0
C552495	0	3.93643	0	0	0	0	0	0
C552511	35.6148	32.5229	34.9886	28.342	38.7261	36.2677	0	44.5428
C552519	0	0	0	0	0	0	0	3.59216
C552521	0	0	0	0	0	2.80879	0	0
C552525	0	0	0	0	0	2.61039	5.3803	4.42825
C552527	0	0	0	0	0	0	0	5.66479
C552535	0	0	0	0	0	0	0	3.56221
C552559	0	3.88035	0	0	0	0	0	0
C552563	8.40536	0	9.62123	0	3.98476	0	0	3.28618
C552569	3.58194	11.2459	0	0	0	0	6.9638	0
C552587	9.45442	0	6.24708	0	5.15589	15.1215	9.13419	26.628
C552601	6.47617	21.6371	5.16013	10.3717	7.19384	14.9543	10.4504	0
C552609	0	0	0	0	0	0	2.62608	0
C552611	3.43089	10.7239	6.22018	0	3.03525	5.34643	0	0
C552613	0	4.76172	0	0	0	0	0	0
C552617	0	0	0	0	0	0	3.58656	0
C552621	0	2.93609	0	0	0	0	0	0
C552629	0	0	0	0	0	0	2.86509	0
C552655	0	0	0	0	0	0	3.13181	0
C552663	0	0	0	0	0	0	2.38336	4.06605
C552675	0	0	3.512	0	0	0	0	0
C552689	0	0	0	0	3.66686	0	0	0
C552713	0	0	0	2.692	0	0	0	0
C552729	0	0	0	0	0	0	3.15863	0
C552761	2.94518	0	0	0	0	0	0	0
C552769	0	3.86153	0	3.91791	4.12098	0	6.68931	11.3355
C552783	0	0	0	0	0	3.15308	0	0
C552819	7.86638	7.84915	0	5.47462	0	11.9863	0	0
C552835	0	0	7.6986	0	0	0	0	0
C552853	5.33031	5.95899	2.8697	3.98176	0	13.103	2.6958	0
C552863	0	0	0	0	0	0	0	2.56148
C552871	3.12491	0	0	0	0	0	0	0
C552883	0	0	0	0	0	0	0	2.91642
C552885	0	4.89797	0	0	0	0	0	0
C552903	0	0	0	0	0	0	2.38099	0
C552915	0	0	0	0	0	0	3.1385	0
C552949	0	3.33645	0	0	0	0	0	0
C552953	5.6528	0	9.32416	0	7.67365	0	5.47416	10.9364
C552989	0	0	0	0	0	0	3.57886	0
C552993	0	4.25802	0	0	0	0	0	0
C553025	0	0	0	0	0	0	0	2.59855
C553053	0	0	0	0	0	2.69689	0	0
C553071	0	0	7.50959	0	0	0	0	0
C553077	0	0	0	0	0	0	2.67986	0
C553095	0	0	2.80673	0	0	0	0	0
C553101	0	0	5.20104	0	0	0	4.0755	0
C553105	0	0	0	0	0	2.70839	0	0
C553127	0	0	3.24222	0	0	0	0	0
C553153	0	0	2.93023	0	0	0	0	0
C553157	0	0	0	0	0	0	2.63057	0
C553201	0	5.70198	0	0	0	0	3.50289	10.5575
C553205	0	2.8383	0	0	0	0	0	0
C553209	0	2.91164	0	0	0	0	0	0
C553241	5.12005	3.55438	3.89696	0	3.15301	3.66682	0	0
C553245	0	0	0	0	0	0	0	2.56367
C553255	0	0	0	0	0	0	2.70002	0
C553261	10.6589	4.07175	6.22148	0	3.3271	5.74932	4.42826	6.24233
C553267	0	6.16099	0	0	0	0	0	0
C553273	0	5.29417	0	0	0	0	0	0
C553283	0	12.7465	0	0	0	0	0	0
C553291	0	0	0	0	0	0	2.71348	0
C553303	0	0	0	0	0	2.86214	0	3.42105
C553307	0	3.32669	0	0	0	0	0	0
C553309	0	2.89698	0	0	0	0	0	0
C553321	0	6.18015	0	0	0	0	0	0
C553331	0	0	0	0	0	0	3.5677	0
C553339	0	0	0	0	0	0	0	2.61163
C553365	14873.1	2466.32	5993.76	13277.7	8741.08	11122.8	11944.6	9151.62
C553419	0	0	2.95544	0	0	0	0	0
C553439	0	3.35254	0	0	0	0	0	0
C553459	0	0	0	0	0	0	2.69862	0
C553467	0	0	2.83222	0	0	0	0	0
C553493	0	7.20012	0	0	0	0	0	0
C553521	0	6.22146	0	0	0	0	0	0
C553527	0	5.10936	0	0	0	0	0	0
C553533	0	0	0	81.5028	0	15.0594	38.3578	50.5605
C553537	0	0	0	0	77.5247	0	58.2165	37.0413
C553543	6.98614	0	0	31.1233	0	0	0	0
C553559	0	9.78397	0	0	0	0	0	0
C553561	0	0	0	0	0	0	2.69862	0
C553579	5.80389	3.34039	0	0	0	3.15482	0	9.33822
C553595	0	6.29615	0	0	0	0	0	0
C553609	0	0	0	0	0	0	3.12839	0
C553645	3.48104	0	0	0	0	0	0	0
C553651	0	0	3.76584	0	0	0	0	0
C553695	0	0	0	0	3.98839	0	0	0
C553723	5.33098	0	10.8986	3.32474	9.90169	4.71538	7.15066	0
C553725	0	8.1642	0	0	0	0	0	0
C553733	0	8.52621	0	0	0	0	0	0
C553749	2.98242	0	0	0	0	0	2.67123	0
C553759	0	4.47788	0	0	0	0	0	0
C553769	0	0	0	0	7.41964	0	0	0
C553785	0	0	0	0	0	3.07726	0	3.02735
C553799	0	0	0	0	0	0	14.705	0
C553805	0	0	0	0	0	0	2.59157	0
C553811	0	0	0	3.28662	0	0	0	0
C553835	0	0	0	0	0	0	0	2.57563
C553837	0	0	0	0	0	5.40129	0	0
C553847	3.71289	0	0	0	4.3887	3.11832	4.97751	5.31697
C553865	0	2.87864	0	0	0	0	0	0
C553875	4.41835	0	0	0	0	0	0	0
C553877	0	4.28191	0	0	0	0	0	0
C553895	0	4.84624	0	0	0	0	0	0
C553901	0	0	0	0	0	0	0	3.42975
C553903	0	0	0	0	0	4.72678	0	0
C553911	3.76233	3.72881	0	0	0	0	3.06869	3.34787
C553915	0	0	3.31136	0	0	0	0	0
C553935	0	0	0	0	0	2.76667	0	0
C553957	0	0	4.30304	0	0	0	0	4.6129
C553971	3.47343	0	0	0	0	0	0	0
C553981	0	2.90052	0	0	0	0	0	0
C553985	0	0	2.89974	0	2.95548	0	0	3.62252
C554031	3.07155	0	0	0	0	0	0	0
C554033	0	9.77283	0	0	0	0	5.90678	0
C554069	0	0	0	0	0	2.6935	0	0
C554141	0	0	2.77679	0	0	0	0	0
C554145	0	0	0	0	0	0	0	2.53005
C554187	0	0	10.3948	0	0	0	0	0
C554191	0	0	0	0	0	0	0	3.85501
C554211	0	0	0	0	0	8.46933	0	0
C554213	0	3.75309	0	0	0	0	0	0
C554263	0	0	0	2.70449	0	0	0	0
C554277	0	2.92244	0	0	0	0	0	0
C554283	4.36007	0	0	4.40695	0	0	0	0
C554331	0	0	0	0	0	0	3.90019	0
C554333	0	0	0	0	0	0	0	2.60166
C554341	0	24.5547	0	0	0	0	47.3185	0
C554345	0	0	0	0	0	0	2.58043	0
C554359	0	0	6.52569	0	0	0	0	0
C554371	0	0	3.94304	0	0	0	0	0
C554379	0	0	2.8901	0	0	0	0	0
C554393	0	8.1642	0	3.60347	9.75375	0	11.5298	16.0819
C554415	0	0	0	0	0	0	0	6.22721
C554437	0	0	2.83592	0	0	0	0	0
C554465	0	0	0	0	0	0	3.56798	0
C554499	0	0	0	0	0	2.80069	0	0
C554505	0	0	3.19312	0	0	0	0	3.65676
C554521	3.10385	7.95443	0	0	0	2.66511	5.10969	7.23945
C554563	0	2.78052	0	0	0	0	0	0
C554567	8.88072	0	0	0	0	1.73469	0	0
C554593	4.41059	0	0	0	0	0	3.91757	0
C554599	0	0	0	0	0	0	0	3.4713
C554609	0	2.98775	0	0	0	0	0	0
C554621	0	0	0	0	0	0	6.80802	0
C554701	0	4.76844	0	0	0	0	0	0
C554703	0	4.2839	0	0	0	0	0	0
C554705	0	3.48344	0	0	0	0	0	0
C554711	0	0	0	0	0	0	0	2.9003
C554723	0	2.96795	0	0	0	0	0	0
C554727	0	4.28521	0	0	0	0	0	0
C554737	0	0	0	0	0	3.12971	0	0
C554821	3.01683	7.45416	6.90706	3.19222	0	6.9918	5.21338	0
C554825	0	0	2.89111	0	0	0	0	0
C554835	0	0	0	2.85474	0	0	0	0
C554837	0	0	2.969	0	0	0	0	0
C554843	0	0	0	0	0	0	2.63508	0
C554863	0	0	0	0	0	0	0	2.61554
C554897	0	0	0	0	0	0	0	2.70716
C554927	0	0	0	3.21526	0	0	3.22192	0
C554963	0	0	0	0	0	0	2.68392	0
C554983	0	0	0	0	0	0	0	2.60905
C554985	0	0	0	0	0	0	2.59956	0
C554987	0	0	0	0	0	0	3.95293	0
C554991	0	3.48178	0	0	7.94979	0	3.95512	0
C555029	0	0	2.83833	0	0	0	0	0
C555061	0	0	3.01036	0	0	0	2.6784	0
C555117	0	0	0	0	0	0	0	5.0936
C555119	0	0	0	0	0	0	3.57461	0
C555187	0	7.52303	0	3.65572	0	0	7.0509	0
C555199	0	0	0	0	4.45291	0	0	0
C555201	0	2.90891	0	0	0	0	0	0
C555207	4.51916	0	9.83652	0	0	0	0	0
C555231	0	2.92344	0	0	0	0	0	0
C555239	0	0	0	0	0	0	3.02535	0
C555243	5.38962	0	0	0	0	0	0	0
C555259	0	5.75295	0	0	0	0	0	0
C555293	0	0	3.86576	0	0	0	0	0
C555313	0	0	0	0	0	0	3.2717	0
C555315	0	0	0	0	0	0	0	2.5097
C555319	0	0	0	0	0	0	5.89159	0
C555333	0	0	0	0	0	2.62869	0	0
C555343	0	0	3.34631	0	0	0	0	0
C555347	0	0	0	3.01858	0	0	0	0
C555349	0	11.9763	0	0	0	0	0	0
C555357	0	0	3.91685	0	0	0	0	0
C555363	0	0	0	0	0	0	3.57238	0
C555377	0	0	0	0	0	0	2.60844	0
C555379	0	0	0	0	0	0	2.51074	0
C555395	0	14.5028	0	0	11.3926	0	0	0
C555405	0	0	0	0	0	2.70379	0	0
C555423	0	0	0	0	0	0	0	3.90387
C555437	3.93033	5.85536	5.09608	4.35568	3.22297	0	5.9642	0
C555439	0	2.98775	0	0	0	0	0	0
C555457	4.1061	0	0	2.51177	0	3.96198	0	0
C555461	0	0	0	0	0	0	0	10.5063
C555473	0	0	3.01725	0	0	0	0	0
C555485	0	0	0	2.58297	0	3.49446	0	0
C555515	0	0	0	0	3.46266	0	0	0
C555579	0	3.41439	0	0	0	0	0	0
C555591	0	0	0	0	0	0	0	2.59702
C555593	0	0	0	0	0	2.8302	0	0
C555605	0	0	0	0	0	0	2.67375	0
C555615	0	0	0	0	0	3.449	0	0
C555643	0	0	0	0	0	0	3.10844	0
C555679	0	0	0	0	0	0	4.36807	0
C555705	0	0	0	0	0	0	2.67597	0
C555711	0	6.11522	4.14088	0	0	0	4.19211	3.70838
C555717	0	0	2.83718	0	0	0	0	0
C555719	0	0	0	0	0	0	0	3.42319
C555735	0	0	0	0	3.55022	0	0	0
C555737	0	0	0	0	0	0	0	2.52179
C555757	0	0	0	3.88159	0	0	0	0
C555769	0	0	0	0	0	1.74113	0	3.09885
C555789	0	0	4.8302	0	0	0	0	0
C555797	5.10952	0	0	0	0	0	0	0
C555833	0	0	0	0	0	0	0	2.49383
C555835	0	0	0	10.3074	12.3471	11.8025	10.2042	0
C555851	0	2.82075	0	0	0	0	0	0
C555859	0	0	7.57609	0	0	0	0	0
C555867	15.1422	31.3693	19.5974	5.29312	23.7498	15.3502	10.275	14.0476
C555885	2.86409	0	0	0	4.84531	0	0	0
C555889	0	0	0	0	0	0	0	2.58685
C555895	0	3.77149	0	0	0	0	0	0
C555897	2.97443	0	0	0	0	3.24932	0	0
C555899	0	0	2.85151	0	0	0	0	0
C555915	0	0	0	0	0	0	3.14522	0
C555917	0	0	4.20984	0	0	3.96636	0	0
C555939	0	15.0854	16.6717	0	24.6841	21.4639	18.2865	19.4327
C555959	0	4.74657	0	0	0	0	0	0
C555961	0	0	3.36429	0	0	0	0	0
C555975	0	3.33373	0	0	0	0	0	0
C555983	13.6298	6.57306	13	9.36507	0	18.8098	11.0941	7.32052
C555987	0	0	0	3.54103	0	0	0	0
C555991	0	3.64884	0	0	5.23555	0	0	0
C556023	0	3.80517	0	0	0	0	0	0
C556027	0	4.27865	0	0	0	0	0	0
C556031	0	0	0	0	0	2.63243	0	0
C556035	0	0	0	0	0	0	3.05775	0
C556043	0	0	3.29757	0	0	0	0	0
C556055	0	12.5577	0	8.57877	5.36671	6.0036	14.5457	12.0055
C556063	0	0	4.71374	0	0	0	0	0
C556075	0	0	0	0	0	0	3.09521	0
C556081	0	3.19422	0	0	0	0	0	0
C556087	0	0	0	0	0	0	2.65165	0
C556089	0	0	4.15514	0	0	0	0	0
C556119	0	0	0	0	4.90714	0	0	0
C556143	0	6.47752	0	0	0	0	0	5.87413
C556149	0	0	0	0	0	0	3.47881	0
C556151	0	4.47288	0	0	0	0	0	0
C556159	0	0	0	0	0	2.68454	0	0
C556163	0	0	0	0	3.83329	0	0	0
C556177	0	0	0	5.52498	0	0	0	0
C556181	8.18247	16.9391	0	0	0	7.87204	7.33391	0
C556189	0	0	0	0	0	0	2.69752	0
C556195	0	8.04931	3.3123	3.40023	0	0	0	0
C556219	0	36.9829	0	8.47319	0	0	0	0
C556239	0	24.6667	0	0	0	0	5.89629	0
C556243	0	0	0	0	0	3.19361	0	0
C556265	0	0	2.93506	0	0	0	0	0
C556293	22.8522	11.4685	0	10.6083	0	11.4756	15.2133	0
C556305	0	0	0	0	0	0	0	5.48446
C556311	0	0	2.88972	0	0	0	0	0
C556319	0	0	0	0	0	0	2.62734	0
C556321	0	4.23569	3.15698	0	0	0	5.12147	0
C556323	0	0	4.21695	0	0	0	0	0
C556341	0	0	0	0	9.97051	0	0	0
C556357	0	12.0026	0	0	0	0	13.1481	0
C556385	0	3.33615	0	0	0	0	0	0
C556397	0	0	0	0	0	0	0	5.03825
C556403	0	0	0	0	0	0	0	2.76939
C556405	0	0	3.12842	0	0	0	0	0
C556415	0	0	3.34762	0	0	0	0	0
C556425	0	0	0	0	0	0	2.67153	0
C556427	0	0	0	0	0	2.65961	0	0
C556435	0	0	0	0	2.8587	0	0	0
C556437	0	0	2.91902	0	0	0	0	0
C556443	0	0	2.77749	0	0	0	0	0
C556465	0	6.16235	0	0	0	0	0	0
C556489	0	7.13351	0	0	0	0	3.63159	0
C556497	0	0	3.78604	0	0	0	0	0
C556501	0	0	0	0	0	2.50884	0	0
C556503	0	0	0	0	0	0	3.9037	3.67227
C556507	0	5.74341	0	0	0	0	4.97803	0
C556513	0	0	0	3.07721	0	0	0	0
C556527	5.74961	17.0664	6.20313	0	12.0146	0	9.52414	5.99382
C556533	0	0	0	0	0	0	0	3.38617
C556535	0	0	0	0	0	0	0	3.74253
C556551	0	0	0	0	0	0	2.6131	0
C556559	0	0	2.72195	0	0	0	0	0
C556603	0	0	0	0	9.5974	2.94502	3.61257	2.98779
C556621	0	3.35944	0	0	0	0	0	0
C556623	3.04185	0	0	0	0	0	3.03937	0
C556639	0	4.25671	0	0	0	0	0	0
C556645	4.43537	0	0	0	0	0	0	0
C556649	3.4458	5.23181	6.05292	2.54163	2.97166	0	4.9343	0
C556657	0	0	0	0	0	0	3.18836	0
C556663	0	0	0	0	0	0	0	2.60258
C556699	3.53213	2.84862	29.0061	3.11407	0	4.86834	0	0
C556709	0	4.29493	0	0	0	0	0	2.61207
C556725	0	0	0	0	0	0	3.41461	0
C556735	0	0	3.8256	0	0	0	0	0
C556743	41.5889	10.5332	44.2285	28.511	25.8871	24.0486	23.2273	22.7661
C556769	0	0	0	0	0	0	0	2.93632
C556781	0	0	1538.34	0	1200.32	850.765	0	0
C556791	0	0	0	0	0	0	0	3.36482
C556797	7.97915	6.97358	6.96444	3.85514	11.1472	9.85401	5.91221	0
C556811	0	0	0	0	0	0	2.78161	0
C556821	0	0	0	0	0	0	3.54495	0
C556827	0	10.3937	0	0	0	0	0	8.38898
C556831	0	0	0	0	0	0	0	2.56799
C556835	0	0	0	0	0	0	2.57571	0
C556857	0	0	0	0	0	0	3.49582	0
C556871	7.77854	14.6243	0	0	0	0	0	0
C556873	0	0	0	2.55927	0	4.07525	0	0
C556891	0	3.3544	0	0	0	0	0	0
C556893	0	0	0	0	0	0	2.90549	0
C556897	0	0	0	0	0	0	0	2.53375
C556927	0	0	0	0	0	0	2.6197	0
C556937	0	0	0	0	0	2.09167	2.24935	1.96161
C556949	0	0	0	0	0	5.89132	0	0
C556961	0	0	3.8995	0	0	0	0	0
C556963	0	5.80484	0	0	5.29567	0	4.90402	0
C556989	0	0	3.04655	0	0	0	0	0
C556991	0	0	0	0	2.86534	0	0	0
C556997	6.48278	0	8.70298	0	0	0	4.31747	0
C557005	3.62714	0	5.11314	0	0	3.06865	0	0
C557013	0	0	0	0	0	2.79851	0	0
C557019	0	5.55755	0	0	0	0	0	0
C557047	0	13.4922	0	3.18624	12.9768	0	0	0
C557067	0	0	0	0	8.27418	0	0	0
C557077	0	0	6.91721	0	0	0	0	0
C557079	0	0	0	0	0	0	3.61852	0
C557087	6.70416	0	4.05332	314.324	0	0	0	56.9021
C557099	0	0	142.748	77.6272	0	106.522	0	72.2818
C557121	0	0	4.3698	0	0	3.82606	0	0
C557141	0	6.52183	7.61072	6.21987	0	2.91826	0	0
C557173	0	0	0	0	0	0	3.8818	3.8954
C557177	0	3.32326	0	0	0	0	0	0
C557179	13.1689	0	0	0	17.2709	10.378	5.9143	0
C557181	3.4415	0	0	0	0	3.15745	0	0
C557247	0	0	4.84062	0	0	0	0	0
C557249	0	0	0	0	2.81097	0	0	0
C557273	0	0	3.83038	0	0	0	0	0
C557281	0	0	0	0	0	3.15423	0	0
C557303	1881.81	2042.58	1079.89	1053.96	1058.22	1995.72	1440.44	1400.05
C557307	0	0	0	0	0	0	0	3.43102
C557309	0	0	3.35716	0	0	0	0	2.99421
C557339	461.466	2664.92	106.3	667.391	264.863	799.597	544.667	796.568
C557345	0	0	0	0	0	0	4.14685	0
C557361	0	0	0	8.54008	0	13.1196	5.5088	6.66294
C557373	0	0	3.30146	0	0	0	0	0
C557375	0	3.54507	0	0	0	0	0	0
C557397	0	13.885	0	3.06576	0	0	10.3055	3.20707
C557399	0	0	0	0	0	0	0	3.79795
C557401	0	0	0	0	0	0	4.05066	0
C557415	1107.75	360.037	283.098	918.037	585.169	1369.39	733.032	850.92
C557429	0	0	0	0	0	3.42044	0	0
C557439	0	0	2.96244	0	0	0	0	0
C557449	0	0	0	0	0	0	0	2.59127
C557519	0	10.7312	3.79717	0	0	3.50071	5.86427	5.36168
C557531	0	0	0	0	0	0	2.69556	0
C557533	0	2.87262	0	0	0	0	0	0
C557541	4.33795	0	0	0	0	0	0	3.01179
C557545	0	3.76622	0	0	0	2.80777	0	0
C557547	0	9.34935	0	0	0	0	0	2.96925
C557549	0	2.89662	0	0	0	0	0	0
C557551	206.091	156.688	339.129	88.6054	171.274	105.604	97.5327	129.284
C557559	7.02529	3.03281	0	0	3.41777	0	3.19429	3.81886
C557565	8.32673	2.61323	7.62379	3.66912	5.48394	7.91402	8.33747	15.4736
C557569	0	7.0116	0	0	0	0	0	3.01857
C557585	3.98959	0	3.0453	0	0	0	0	0
C557601	0	0	0	0	0	0	3.14398	0
C557605	0	4.22309	0	0	0	0	0	0
C557609	0	0	2.78998	0	0	0	0	0
C557621	0	0	0	0	0	0	3.81185	0
C557645	0	0	0	0	0	0	4.4714	0
C557649	0	0	3.75626	0	0	0	0	0
C557675	0	0	0	0	0	0	3.03863	0
C557685	0	108.587	509.035	150.631	125.182	534.284	350.184	0
C557709	0	5.31284	0	0	0	0	0	0
C557715	0	3.37329	0	0	0	4.84417	0	0
C557719	0	4.10418	0	0	0	0	0	0
C557723	0	0	0	0	0	0	3.10081	0
C557733	0	0	0	0	6.94651	0	0	0
C557747	0	0	0	0	0	0	0	4.13268
C557753	7.50253	16.3528	0	9.65448	0	8.35894	0	9.19172
C557783	0	0	0	0	0	0	2.53986	0
C557797	0	0	0	2.96643	0	0	0	0
C557853	0	4.59405	0	0	0	0	0	0
C557871	0	5.56557	2.79945	0	0	0	0	0
C557883	0	0	0	0	0	2.65328	0	0
C557901	0	3.43714	0	0	0	0	0	0
C557911	0	0	0	0	0	0	0	2.94993
C557955	0	0	0	2.755	0	0	0	0
C557969	15.7195	20.517	11.9734	16.6048	18.1793	21.0795	24.6753	28.4994
C557977	0	0	0	0	0	0	3.08449	0
C557995	0	3.34149	0	0	0	0	0	0
C558039	0	0	2.90166	0	0	0	0	0
C558053	0	6.27168	0	0	0	0	0	2.76005
C558057	0	0	0	0	4.82824	0	2.55519	0
C558067	91.6682	0	426.246	116.433	16.7474	378.007	256.029	0
C558081	0	0	3.30859	0	0	0	0	0
C558085	0	0	3.33364	0	0	0	0	0
C558089	0	0	3.2392	0	0	0	0	0
C558101	0	2.87862	0	0	0	0	0	0
C558127	0	0	0	10.877	0	0	0	0
C558159	0	0	0	0	0	0	5.86999	0
C558163	0	0	0	4.96698	0	0	0	0
C558165	0	0	0	0	3.60739	0	0	0
C558167	0	0	0	0	0	0	3.37284	0
C558169	0	0	0	0	0	0	0	2.55841
C558191	0	0	0	0	0	0	0	3.35799
C558245	0	0	0	0	0	6.54315	5.14273	0
C558251	0	0	0	0	0	0	3.02332	0
C558291	0	0	2.84678	0	0	0	0	0
C558311	0	0	0	0	0	0	0	6.66864
C558313	0	0	0	0	0	0	3.06701	0
C558367	0	0	0	0	0	0	0	2.50088
C558383	0	5.0958	2.96033	0	0	0	4.52757	17.43
C558387	0	3.7872	0	0	0	0	0	0
C558397	0	0	2.75212	0	0	0	0	0
C558415	10.2707	6.12071	10.5034	9.06084	6.26879	9.18081	8.99168	4.15389
C558417	6.00101	10.3592	6.4382	0	7.04906	6.10948	5.14681	8.01638
C558427	0	3.03436	0	0	8.71521	4.51656	2.74038	4.23691
C558435	0	5.03633	0	0	0	0	0	0
C558443	383.728	396.835	171.913	514.126	339.288	185.317	669.537	599.53
C558451	0	0	0	0	0	0	4.74672	0
C558457	0	0	0	2.8456	0	0	0	0
C558459	0	0	0	0	0	0	10.2173	0
C558461	0	0	5.7323	0	0	0	0	2.84387
C558467	0	0	4.29159	4.31593	4.44031	3.05566	0	0
C558469	23.6121	145.475	0	0	0	21.1976	39.7253	79.3713
C558475	199.212	559.676	56.0339	443.827	107.636	446.145	928.487	570.387
C558477	0	0	0	4.21786	0	0	0	0
C558499	0	0	0	2.7405	0	0	0	0
C558513	0	0	0	0	0	0	2.60336	0
C558531	0	6.70552	0	0	0	0	0	2.59447
C558539	0	0	54.1908	0	0	0	0	0
C558589	0	0	0	0	0	0	2.99006	0
C558595	0	0	0	4.50571	0	0	2.53486	2.52006
C558599	3344.55	699.569	3919.91	1567.75	3136.34	1701.66	1255.25	1621.26
C558625	0	7.99255	0	0	0	0	0	0
C558627	0	0	0	0	0	6.9727	0	0
C558637	0	0	0	3.81141	0	0	0	5.32175
C558689	0	0	2.69484	0	0	0	0	0
C558693	0	0	0	0	0	0	3.96177	0
C558703	0	0	0	0	0	0	0	3.0264
C558705	0	1.93552	0	0	0	0	0	0
C558711	0	3.86958	0	0	0	0	0	0
C558741	0	0	0	3.32562	0	0	0	0
C558763	3.46667	0	4.50552	0	0	0	0	0
C558769	6.13157	31.8092	14.1039	7.65343	17.3958	7.6127	11.6684	7.36466
C558781	0	0	0	0	0	0	0	2.47468
C558789	0	0	0	0	0	3.03424	0	0
C558791	2.9246	0	0	0	0	0	0	2.56693
C558795	4.39773	0	7.30017	0	9.37673	0	4.95031	0
C558807	0	3.32257	3.18052	0	6.18654	0	2.5405	0
C558817	0	0	0	0	0	0	0	2.56799
C558829	0	6.92724	0	0	0	0	0	0
C558833	0	0	0	0	0	0	2.63948	0
C558837	0	0	0	4.06154	0	3.49594	0	2.65801
C558839	0	0	0	0	0	0	3.03355	0
C558843	0	0	0	0	0	0	0	2.56161
C558845	0	14.2523	0	0	0	0	0	0
C558847	0	0	6.73595	0	0	0	0	0
C558853	0	0	0	0	0	3.18327	0	0
C558857	0	0	0	0	0	0	2.60025	0
C558861	4.27661	0	0	0	0	0	5.58248	4.90264
C558877	0	5.16969	0	0	0	0	0	0
C558887	0	0	0	0	0	0	0	4.10764
C558893	0	4.79219	0	0	0	0	0	2.87731
C558899	0	0	0	2.98942	2.79522	4.8089	0	0
C558913	0	2.837	0	0	0	0	0	0
C558917	0	0	0	0	0	0	2.51959	0
C558929	0	0	0	0	6.63865	4.78001	0	0
C558933	0	0	0	0	0	0	2.58934	0
C558971	0	0	5.82984	0	0	0	0	0
C558987	0	3.933	0	0	0	0	0	0
C558989	0	0	0	0	0	0	0	2.56161
C558993	0	5.95844	0	0	0	0	0	0
C559033	0	0	0	0	0	0	0	2.67456
C559035	0	2.91337	0	0	0	0	0	0
C559057	0	0	0	0	0	3.60197	0	0
C559059	0	0	0	0	0	3.59602	0	0
C559061	0	0	0	0	0	0	6.46797	0
C559063	0	3.35919	0	0	0	0	0	0
C559067	2.37042	0	3.20418	0	0	0	2.71729	0
C559071	0	0	0	0	0	0	3.82494	0
C559097	3.50591	0	0	0	0	0	0	0
C559127	0	2.84175	0	0	0	0	0	0
C559131	0	2.74663	0	0	0	0	0	0
C559145	0	0	0	0	0	0	0	4.57624
C559147	0	0	3.7345	0	0	0	0	0
C559153	0	0	0	0	0	0	2.76517	0
C559155	0	0	0	0	0	2.68144	0	0
C559157	0	3.81721	5.16759	0	3.99683	0	0	0
C559161	0	0	3.7815	0	0	0	0	0
C559175	3.91864	0	0	0	0	0	0	0
C559187	0	0	0	0	0	0	2.63948	0
C559195	0	0	0	0	0	0	2.56102	0
C559213	0	0	0	0	0	2.92947	0	0
C559219	0	0	9.35704	0	0	0	0	0
C559233	7.96094	0	0	6.04052	4.63775	5.24165	4.77725	0
C559239	0	0	0	0	0	0	0	2.89211
C559241	0	2.73712	0	0	0	0	0	0
C559259	0	0	0	0	0	3.14792	0	0
C559293	3.91441	0	0	0	2.81726	0	0	0
C559309	0	0	4.54896	0	0	0	0	0
C559325	0	0	0	0	0	0	3.04893	0
C559341	0	0	0	2.48576	0	0	0	0
C559361	0	0	0	0	0	0	2.99657	0
C559371	0	0	0	0	3.4194	0	0	0
C559383	0	5.21454	0	0	0	0	0	0
C559387	2.88975	0	0	0	0	0	0	0
C559389	0	3.83001	0	0	0	0	0	0
C559397	1496.63	537.097	366.995	1474.41	780.979	2200.21	1324.76	1799.58
C559399	0	2.18606	0	0	3.00202	0	0	0
C559403	3.57916	3.47474	0	2.91375	4.49098	0	4.01645	0
C559415	94.5516	0	6.27607	5.08481	79.626	4.90648	4.74908	4.63942
C559435	0	0	4.08707	0	0	0	0	0
C559437	214.881	0	0	0	0	0	0	0
C559453	0	0	0	0	0	2.6971	0	0
C559459	0	0	0	0	0	0	0	3.87038
C559467	0	0	0	0	0	2.66357	0	0
C559487	0	0	0	0	0	0	0	3.56949
C559495	0	0	0	0	0	0	3.00527	0
C559511	0	3.61705	0	0	0	0	0	5.83786
C559513	0	0	3.16316	0	0	0	0	0
C559517	1108.69	493.072	1032.65	971.189	1220.76	998.641	1285.25	926.396
C559523	0	12.7225	0	0	0	0	3.73638	0
C559525	0	0	0	0	0	0	0	3.67099
C559539	120.029	348.854	49.289	307.996	66.3143	332.906	354.619	304.38
C559545	0	4.6389	0	0	0	0	0	0
C559579	0	0	3.20059	0	0	0	0	0
C559587	0	0	0	0	0	3.51801	3.82504	0
C559615	0	5.31872	0	0	0	0	0	0
C559631	0	4.14502	0	0	0	0	0	0
C559653	0	8.3587	0	0	0	0	0	0
C559659	0	0	0	0	0	0	5.47764	4.94563
C559669	0	14.8639	0	0	0	0	10.609	0
C559683	0	0	0	0	3.57428	0	0	0
C559701	0	0	5.93637	0	0	0	0	0
C559709	0	0	0	0	0	0	3.20277	0
C559723	11.3839	0	22.0114	5.89898	17.5848	8.67927	16.1745	6.02181
C559725	0	2.84783	0	0	0	0	0	0
C559753	0	0	4.28054	0	0	0	0	3.51137
C559765	0	0	0	0	0	0	2.81418	0
C559771	0	4.10219	0	3.98627	0	3.71082	4.06694	0
C559773	0	0	0	0	0	0	0	3.34874
C559789	0	5.67073	0	0	0	0	0	0
C559797	0	0	0	0	0	0	4.3153	0
C559813	0	0	0	0	2.97778	0	0	0
C559815	0	5.94254	0	0	0	0	0	0
C559825	0	0	0	0	2.85083	0	0	0
C559833	0	0	0	0	0	0	2.9917	0
C559855	0	0	0	0	0	0	4.92926	3.60145
C559857	0	0	2.7177	0	0	0	0	0
C559873	0	6.52795	0	0	0	0	5.4819	0
C559877	0	5.3886	0	0	7.24445	0	0	5.0211
C559895	0	0	0	0	0	0	2.62536	0
C559901	0	13.4244	0	0	0	0	0	0
C559905	0	16.3873	0	0	0	0	0	7.61161
C559911	0	0	0	0	0	0	2.52555	0
C559913	0	0	4.13631	0	0	0	0	0
C559923	0	0	0	0	0	3.43334	0	0
C559927	0	0	0	0	0	0	0	2.70029
C559937	3.00056	0	0	0	0	0	0	0
C559975	0	0	0	0	0	0	0	4.97498
C559997	0	0	0	0	0	0	2.54075	0
C560007	0	0	0	0	0	0	0	2.94857
C560011	0	0	0	0	0	0	2.59716	0
C560023	0	5.20509	0	0	0	0	0	0
C560031	2.93614	0	0	0	0	0	0	0
C560047	0	4.46765	5.9683	0	0	0	0	0
C560051	0	0	0	0	0	0	0	2.55636
C560061	3.94794	0	0	0	0	0	0	0
C560063	0	0	0	0	0	0	12.0426	0
C560067	5.52012	0	0	0	3.14476	0	0	0
C560091	188.774	0	244.952	100.926	0	151.759	0	131.351
C560105	0	4.29209	0	0	0	0	0	0
C560127	3.39817	0	11.5644	0	0	8.67704	3.84231	0
C560129	0	0	0	0	0	0	0	2.7513
C560133	0	0	0	4.91852	0	0	0	4.07382
C560159	6.64105	7.07909	6.76849	1.90041	3.10363	3.54184	5.04864	4.49249
C560161	6.43677	12.8591	11.2658	0	3.26039	0	0	3.19755
C560179	0	3.92549	0	0	0	0	0	2.71305
C560207	5.18034	7.08826	5.40249	0	8.72745	0	10.8209	0
C560209	5.23849	2.80846	0	0	5.27512	0	0	0
C560213	0	9.0662	3.8995	0	2.95564	0	0	0
C560225	0	0	0	0	0	3.9901	0	0
C560247	6.62344	0	3.3875	0	0	0	0	0
C560259	0	0	0	0	0	0	3.80069	0
C560283	0	0	0	0	0	0	7.59915	3.4167
C560285	0	0	0	0	4.22147	0	0	0
C560289	0	0	0	0	4.20446	0	3.67017	0
C560309	0	3.34866	0	0	0	0	0	0
C560317	0	0	0	0	0	0	0	2.93384
C560325	0	0	0	0	0	0	0	2.50358
C560353	0	0	0	0	0	0	3.01553	0
C560359	0	0	2.82102	0	0	0	0	0
C560363	0	0	0	0	0	0	7.96506	0
C560389	199.393	145.209	0	116.104	68.4737	163.349	105.279	73.7112
C560455	0	2.77681	0	0	0	3.81304	3.94951	0
C560461	14.2608	15.4435	14.4596	17.5388	21.4249	24.4051	12.4964	6.14319
C560463	0	7.044	0	0	0	0	0	0
C560467	0	0	0	0	0	0	2.54291	0
C560471	0	0	0	0	0	0	2.62754	0
C560473	0	0	0	0	0	0	2.9917	0
C560505	0	0	0	0	0	3.02054	0	0
C560527	0	0	0	0	0	0	4.29156	0
C560535	0	0	0	0	3.88185	0	0	0
C560539	0	0	0	0	0	3.07268	0	0
C560561	0	0	3.6334	0	0	0	0	0
C560575	3.41339	0	0	0	0	0	0	0
C560583	0	0	0	0	0	0	0	2.49442
C560595	0	0	3.73357	0	0	0	0	0
C560619	0	0	0	0	0	0	3.44806	0
C560623	12.5229	14.3966	8.58013	13.009	11.4126	14.6686	15.8013	0
C560625	0	8.73533	0	0	6.76948	5.23657	3.96019	3.02418
C560629	0	0	0	0	0	2.60637	0	0
C560635	0	0	0	0	0	3.10418	4.16385	0
C560647	0	0	0	3.69373	0	0	0	0
C560651	0	2.80217	0	0	0	3.40227	0	0
C560657	0	0	3.27472	0	0	0	0	0
C560667	0	0	0	0	0	0	3.45453	0
C560681	0	0	0	0	3.60921	0	0	0
C560733	0	0	0	0	0	0	2.55306	0
C560741	0	0	3.22814	0	0	0	0	0
C560751	0	0	0	0	4.47852	6.61104	0	3.2624
C560755	0	8.67946	0	0	0	0	2.86188	0
C560767	0	0	0	0	0	0	2.54874	0
C560803	0	3.67501	0	0	0	0	0	0
C560807	0	0	0	0	0	2.84773	0	0
C560809	0	0	0	0	0	0	0	4.14611
C560819	7.09784	25.0762	0	0	0	0	0	0
C560843	0	9.26646	0	0	0	6.54554	0	0
C560849	5.38466	12.7082	8.68297	0	0	5.47182	7.18347	4.02478
C560861	0	2.75488	7.48187	0	7.55803	0	11.1543	2.9683
C560883	0	0	0	0	0	2.67475	0	0
C560893	0	0	0	0	0	0	4.23502	2.55074
C560899	0	0	0	0	0	0	2.38099	0
C560923	0	0	0	0	0	0	2.67504	0
C560945	0	0	0	0	0	2.67943	0	0
C560963	0	0	0	0	4.25774	0	0	0
C560965	0	0	4.08212	0	0	0	2.38336	0
C560971	0	0	0	0	2.92889	0	0	0
C560973	0	8.23324	0	0	0	0	0	0
C560983	3.96954	0	0	0	0	0	0	0
C560989	0	3.51847	0	0	0	0	0	0
C561017	0	2.83264	0	0	0	0	0	0
C561027	0	4.03471	0	0	0	0	0	0
C561031	0	0	0	0	0	0	2.50986	0
C561035	0	0	0	0	0	0	2.77744	0
C561067	0	0	4.55929	0	0	0	0	0
C561073	0	0	0	0	0	0	3.42005	0
C561077	0	9.48268	0	0	0	0	0	0
C561097	0	0	0	0	0	0	4.12346	0
C561099	2.99162	0	3.16992	4.40436	0	0	2.67948	0
C561129	0	0	5.49946	0	0	0	0	0
C561137	0	0	0	0	0	0	2.47962	0
C561139	0	0	0	0	2.83558	0	0	0
C561189	0	0	3.10471	0	0	0	0	0
C561215	0	6.86541	0	0	3.30147	0	0	0
C561253	0	0	3.70328	0	0	0	0	0
C561261	3.88835	0	0	0	0	0	0	0
C561271	0	0	3.65204	0	0	0	0	0
C561281	0	0	6.06449	0	0	0	0	0
C561285	0	0	0	0	0	0	0	2.93324
C561311	0	0	2.80898	0	0	2.57537	0	0
C561329	0	0	0	0	0	0	2.5401	0
C561333	0	0	3.64507	0	0	0	0	0
C561371	0	2.85386	0	0	0	0	0	0
C561383	0	0	0	0	0	0	0	2.96048
C561403	3.93512	0	6.47458	0	0	6.10446	5.9565	0
C561415	0	8.3471	0	0	0	0	0	0
C561439	0	0	0	0	0	0	0	2.87242
C561453	0	27.1092	0	0	0	0	0	0
C561455	4.88335	0	4.69212	4.09715	4.4386	3.48702	0	3.21419
C561481	0	0	0	0	0	0	2.52454	0
C561499	14.0932	2.96127	0	0	3.98542	0	0	3.24991
C561509	0	0	0	0	4.67835	0	0	0
C561519	5.84632	0	0	0	0	2.78571	7.03899	0
C561529	0	0	0	0	0	0	0	3.27495
C561543	0	4.05028	0	7.82821	15.076	11.3139	14.1657	9.90196
C561547	0	6.47635	3.66296	0	0	4.78783	3.80979	4.35097
C561555	0	9.67711	0	0	0	0	0	0
C561557	0	4.46166	0	0	5.21992	0	0	0
C561567	0	5.1583	0	0	0	0	0	2.57971
C561573	0	0	0	3.12959	0	0	0	0
C561575	0	11.034	14.3669	5.05273	9.88283	6.63758	6.70086	5.92685
C561577	0	0	0	0	0	0	0	4.60659
C561601	0	0	0	0	0	3.36303	0	0
C561609	0	0	0	0	0	0	2.95635	0
C561615	0	0	0	0	0	0	4.16762	0
C561619	0	0	0	0	0	0	3.72227	0
C561621	0	3.02135	0	0	0	0	0	0
C561631	0	0	0	4.55022	0	0	0	0
C561633	0	0	0	3.91791	0	0	0	0
C561659	0	0	0	4.68937	0	0	0	0
C561661	0	0	0	0	0	0	0	3.39928
C561689	0	4.19676	0	0	0	0	0	0
C561695	0	3.24424	0	0	0	0	0	0
C561697	0	7.7471	0	0	0	0	0	0
C561705	0	8.5882	0	0	0	0	3.66347	0
C561713	0	0	0	0	0	0	0	2.5146
C561733	0	0	3.98992	0	0	0	0	0
C561737	0	0	0	0	0	0	2.62754	0
C561743	3.12794	0	3.34347	2.90257	3.74969	0	2.30041	0
C561767	0	0	14.1597	0	0	0	0	0
C561769	0	2.896	0	0	0	0	0	0
C561771	0	2.79883	0	0	0	0	0	0
C561783	0	0	0	3.03804	0	0	0	0
C561787	0	0	0	0	3.43558	3.39419	3.35326	6.05333
C561807	0	0	0	0	0	0	3.02929	0
C561809	0	0	0	0	0	0	0	5.61804
C561821	6.35173	0	0	7.60701	11.139	0	0	0
C561829	0	0	0	0	0	2.6564	0	0
C561881	0	0	0	0	0	3.65739	0	0
C561883	4.48438	7.09122	5.74982	8.0159	10.7915	7.22803	3.95713	5.48911
C561907	0	0	2.72831	0	0	0	0	0
C561917	0	0	0	0	0	2.62113	0	0
C561919	0	0	0	0	0	0	3.02181	0
C561939	0	15.8321	0	4.57397	0	8.22414	0	0
C561991	0	0	0	0	3.35763	0	0	0
C561997	0	0	3.42976	0	0	0	0	0
C562007	3.05226	0	0	0	0	0	0	0
C562023	0	5.15429	0	0	0	0	0	0
C562041	0	2.92924	0	0	3.68248	0	0	0
C562045	4.29725	0	0	0	0	0	0	0
C562047	0	0	3.95338	0	0	3.83372	0	0
C562051	0	0	3.37388	0	0	0	0	0
C562061	0	3.68666	0	0	0	0	0	0
C562067	3.78765	0	0	0	0	0	0	0
C562071	0	0	0	0	0	0	4.69632	0
C562073	0	0	0	0	0	0	3.66649	0
C562079	0	0	0	0	0	0	0	2.49368
C562095	0	0	0	0	0	0	8.08162	0
C562099	0	0	0	10.5552	0	0	0	0
C562107	0	0	0	0	0	0	12.4168	0
C562115	0	0	0	0	0	0	0	2.47276
C562137	0	0	3.23048	0	0	0	0	0
C562151	0	0	0	0	0	0	2.59321	0
C562167	0	0	3.78604	0	0	0	0	0
C562173	0	0	0	0	0	0	2.97996	0
C562179	0	0	0	0	0	0	0	3.71315
C562181	5.74841	0	3.36907	2.89614	3.52412	0	0	0
C562197	0	0	0	0	0	0	4.32174	0
C562205	0	0	0	0	0	2.93978	0	0
C562213	0	0	0	2.54068	0	0	0	0
C562215	0	0	3.7497	0	0	0	0	0
C562217	3.39322	0	4.80578	0	3.88472	4.56002	0	2.78059
C562219	3.67096	0	0	2.61273	0	0	3.44848	0
C562227	0	0	3.72381	0	0	0	0	0
C562259	0	0	0	2.60964	0	0	0	0
C562273	0	0	2.73065	0	0	0	0	0
C562307	0	0	4.62206	0	0	0	0	0
C562351	0	0	0	0	0	0	2.93276	0
C562355	0	0	0	0	0	0	4.28533	0
C562361	0	0	0	0	0	3.92597	0	0
C562371	0	0	0	0	0	0	0	2.53344
C562381	0	3.16701	0	0	0	0	0	0
C562415	0	0	0	0	0	0	2.56095	0
C562425	0	0	0	0	3.46935	0	0	0
C562431	0	3.45256	0	0	0	0	0	0
C562447	0	0	0	0	0	0	2.98163	0
C562469	7.02861	0	0	0	0	2.58427	4.89424	5.35354
C562471	0	9.13539	4.36449	6.74526	6.97665	6.38214	9.74742	3.09208
C562489	0	2.69759	0	0	0	0	0	0
C562493	0	0	0	0	0	0	0	3.54106
C562495	0	4.97094	0	0	0	0	0	0
C562497	0	0	0	0	0	0	0	2.6623
C562499	0	0	0	0	0	0	2.54739	0
C562513	0	0	0	0	4.49182	0	0	0
C562529	3.36835	0	0	0	0	0	0	0
C562531	0	0	0	0	0	3.40061	2.63402	0
C562549	3.52206	3.86867	0	0	0	0	4.98169	7.38929
C562559	0	3.7719	0	0	0	0	0	0
C562569	7.17317	0	4.60862	5.77411	3.41452	0	15.6599	7.47021
C562573	0	12.4807	0	0	0	0	0	0
C562593	0	0	0	0	0	0	0	4.90968
C562605	0	0	0	2.93889	0	0	0	0
C562617	0	0	0	0	0	0	3.14398	0
C562623	0	3.11328	0	0	0	0	0	2.84477
C562629	4.74055	3.50523	8.88729	3.49756	5.61018	3.58689	11.226	3.25206
C562643	0	0	0	2.95602	0	0	7.53887	0
C562655	0	0	0	0	0	0	3.7181	0
C562697	3.48088	0	6.6901	0	3.8283	0	3.0313	0
C562705	0	9.22259	0	0	0	3.90153	8.35227	7.77909
C562707	0	0	35.227	0	0	0	0	0
C562711	0	6.8024	0	0	0	6.62663	0	0
C562717	0	0	0	0	0	0	2.511	0
C562723	0	8.40489	5.75652	0	3.95057	6.18219	9.88812	7.53969
C562725	0	0	0	0	3.85936	0	0	0
C562733	0	0	3.80666	0	0	0	0	0
C562749	0	0	0	0	0	0	2.66218	0
C562753	4.58156	10.5463	5.53978	0	0	0	0	0
C562763	0	0	0	0	0	0	0	2.52213
C562765	0	0	0	0	3.41617	0	4.50712	0
C562785	5.994	5.08423	0	2.80992	0	0	4.94137	0
C562795	0	0	9.18617	0	0	0	3.7655	12.2128
C562803	24.5771	155.005	4.52319	10.0007	9.10622	31.5855	20.2073	8.69853
C562807	0	0	0	0	0	0	3.60957	0
C562811	15.6695	14.5663	9.6364	19.822	16.094	0	14.7545	14.2362
C562823	0	0	0	0	0	0	2.59235	0
C562831	0	0	0	0	0	12.1032	10.824	0
C562837	0	9.8395	0	0	0	0	6.09255	0
C562839	0	0	4.95637	4.2963	0	3.26393	3.925	0
C562869	21.116	11.8048	0	322.851	0	44.4208	102.156	96.7094
C562873	0	3.16454	0	0	0	0	0	0
C562891	0	0	0	0	0	0	2.60774	0
C562897	0	0	15.5408	0	0	0	0	0
C562901	0	0	0	0	0	0	0	2.47631
C562909	186.478	300.81	0	2915.8	120.105	1317.75	1321.98	2571.67
C562931	0	0	0	6.38283	0	8.29695	0	0
C562935	6.24493	0	0	0	0	0	0	0
C562939	3.02559	0	0	0	0	0	0	0
C562941	0	0	0	0	0	0	0	2.49088
C562947	0	0	0	0	5.6901	0	0	0
C562959	0	0	0	0	0	0	2.63948	0
C562967	0	3.68187	0	0	0	0	0	0
C563005	0	0	0	0	3.68497	0	0	0
C563009	0	0	5.50585	0	0	0	0	0
C563021	0	0	0	0	4.2299	0	0	0
C563027	0	2.87749	3.30707	0	4.93773	0	2.72445	2.31126
C563037	0	0	0	0	0	0	2.53669	0
C563043	3.89031	18.6795	0	0	0	29.7	3.69107	32.0769
C563083	0	0	4.6519	0	0	0	0	0
C563093	0	3.37905	0	0	0	0	0	3.47275
C563099	0	0	0	0	0	0	0	3.65103
C563107	2.66677	0	0	0	0	0	0	0
C563121	0	0	0	0	0	0	2.59235	0
C563123	0	0	0	0	0	0	2.63398	0
C563135	0	0	0	0	0	0	2.55382	0
C563145	0	7.33192	0	0	0	0	0	0
C563163	0	3.26242	0	0	0	0	0	0
C563187	0	0	0	0	0	3.18005	0	0
C563199	0	0	2.90506	0	0	0	0	0
C563207	0	0	0	0	0	0	0	2.97466
C563249	0	0	0	0	0	0	2.94957	0
C563253	0	0	0	0	0	3.50409	2.64716	0
C563255	0	0	0	0	0	0	2.52385	0
C563271	0	3.14359	0	0	0	0	0	0
C563275	0	3.68422	0	0	0	0	4.15974	0
C563289	0	0	0	2.59583	0	0	0	0
C563315	0	0	10.1575	0	0	0	0	0
C563325	0	0	0	0	0	0	4.14761	0
C563341	0	0	0	2.54604	0	2.5891	6.85914	4.61438
C563355	11.2114	0	0	0	5.65297	0	9.84266	0
C563375	0	0	0	0	0	0	0	2.50677
C563401	2.82067	4.20647	0	0	0	0	0	0
C563417	10.4731	5.56665	8.83298	0	0	3.11004	3.47661	0
C563433	0	0	0	0	0	3.16004	0	0
C563437	18.302	80.2141	65.0321	16.3813	50.9941	44.3154	24.0295	47.5558
C563443	14.2415	23.1841	15.9818	8.77787	22.1847	20.7242	14.8142	0
C563445	0	0	53.9005	0	0	0	0	0
C563449	4.72443	21.8847	0	0	0	3.26642	3.53613	5.67744
C563451	0	5.29598	0	0	0	0	0	0
C563471	0	0	0	0	0	0	3.52796	0
C563475	5.57745	2.77537	5.88505	0	0	5.508	0	0
C563483	0	0	2.78698	0	0	0	0	0
C563501	0	0	0	0	0	5.96105	0	0
C563527	5.81853	0	7.40736	0	5.17224	12.4288	5.87989	4.95479
C563545	0	0	0	0	0	3.32885	3.79558	0
C563553	0	0	0	0	0	0	0	13.9337
C563563	0	0	0	0	0	0	0	2.57757
C563565	2.93455	0	4.12046	0	0	3.78442	0	0
C563643	0	0	0	0	5.19131	0	0	0
C563673	0	0	0	2.64752	0	0	0	0
C563713	3.19059	0	0	3.32223	3.70687	3.33991	7.74467	3.04469
C563719	0	0	0	0	0	2.70831	0	0
C563721	0	3.65627	0	0	0	0	0	0
C563743	0	0	0	0	0	0	2.58147	0
C563749	0	0	0	0	4.46355	5.63918	6.23263	4.71822
C563761	0	0	2.99623	0	0	0	0	0
C563771	0	0	0	0	0	0	5.52278	0
C563775	0	0	3.15302	0	0	0	0	0
C563781	0	2.8176	0	12.261	0	7.26735	12.4071	4.71206
C563783	0	0	0	0	0	0	2.4977	0
C563791	0	0	2.78929	0	0	0	0	0
C563801	21.5007	33.802	21.4787	20.04	18.0951	26.542	23.2583	22.9885
C563803	18.0134	44.8244	16.7773	10.544	18.5643	17.8475	15.4257	17.4306
C563805	0	0	0	0	0	0	2.99335	0
C563807	0	0	0	42.9867	0	0	30.2672	0
C563813	0	18.0006	0	0	0	0	0	0
C563819	0	0	2.68563	0	0	0	0	0
C563835	0	9.78175	0	3.83356	8.91137	2.56725	0	2.7742
C563845	0	0	0	0	0	0	2.43591	0
C563849	0	0	0	0	0	0	3.79344	0
C563861	0	0	0	0	0	0	2.98756	0
C563865	0	0	0	0	0	0	3.3469	0
C563873	0	5.04764	0	0	0	0	0	0
C563877	13.8281	58.9458	3.07641	0	0	5.68808	9.7816	17.6813
C563879	0	0	0	0	0	2.61079	0	6.36053
C563885	3.2506	3.20155	14.6671	0	14.3845	0	0	0
C563895	0	15.813	0	0	0	0	0	11.7277
C563909	0	0	0	0	0	6.39186	0	0
C563915	53.4836	78.9949	59.8007	44.0519	105.381	74.4501	59.9451	33.604
C563921	0	0	5.98944	0	0	0	0	0
C563925	0	0	0	4.56923	0	0	0	0
C563931	0	0	0	0	0	0	4.27697	0
C563941	23.2055	6.84149	9.33383	6.62901	6.29679	10.147	10.9723	6.67105
C563943	0	0	0	0	0	0	2.52116	0
C563953	3.32669	0	0	0	0	0	0	0
C563977	7.02574	0	32.8084	0	0	0	0	0
C563983	2.7671	0	0	0	0	0	0	0
C563987	0	0	0	0	0	3.94124	0	0
C564017	5.81609	6.94548	7.68433	0	2.95931	0	0	0
C564021	0	6.64321	0	5.06708	6.10036	0	0	0
C564037	0	0	0	0	0	0	3.8231	0
C564045	5.23151	0	0	6.33294	0	44.8888	42.7629	7.01807
C564049	0	0	0	0	0	2.64151	0	0
C564061	0	2.76465	0	0	0	0	0	0
C564063	0	0	0	0	0	2.53229	0	0
C564079	0	0	0	0	0	0	0	3.28531
C564097	0	0	0	0	0	0	3.05882	0
C564103	0	0	2.76165	0	0	0	0	0
C564107	0	2.79487	0	0	0	0	0	0
C564119	0	0	3.27388	0	0	0	0	0
C564125	638.782	444.833	958.575	0	864.15	458.418	325.206	376.991
C564151	0	0	0	0	0	0	2.7606	6.9603
C564157	34.2547	53.8598	0	0	0	10.0912	33.408	67.6877
C564159	2.97258	28.9281	0	0	0	0	0	4.7749
C564187	0	0	0	0	0	0	0	2.44042
C564201	0	0	0	0	4.75254	0	3.51702	0
C564207	0	0	2.78929	0	0	0	0	0
C564249	0	0	0	0	0	0	3.73176	0
C564251	0	0	3.88247	0	0	0	0	0
C564259	3.43664	0	0	0	0	13.9788	5.90738	7.69927
C564263	0	4.2839	0	0	0	0	0	0
C564265	0	4.01819	0	0	0	0	0	0
C564269	0	0	0	0	0	0	5.78065	0
C564273	15.4241	28.7914	4.7416	30.7329	0	12.986	26.5508	20.9508
C564303	5.80886	0	0	0	0	0	0	0
C564307	0	0	0	0	0	3.07551	0	0
C564313	0	3.25029	0	0	0	0	0	0
C564321	0	0	0	0	0	0	4.17788	0
C564327	0	0	0	0	2.6921	0	0	0
C564331	0	0	0	4.05767	3.28623	4.65252	3.32353	0
C564335	202.572	1401.11	115.828	398.309	203.843	193.092	267.051	236.374
C564349	4.95742	0	0	0	0	0	0	0
C564351	0	0	3.53804	0	0	0	0	0
C564377	0	0	0	0	0	2.62114	0	0
C564389	0	0	0	0	0	0	4.19491	0
C564433	0	0	0	0	0	0	2.65153	0
C564439	0	4.96106	0	0	0	0	0	0
C564445	0	0	0	0	0	0	3.79781	0
C564447	0	5.49787	0	0	0	0	0	0
C564471	0	0	0	0	0	0	3.06521	0
C564477	0	0	0	0	3.16832	0	0	0
C564485	0	0	0	0	0	0	0	3.27278
C564497	0	0	0	0	4.95612	0	2.08006	0
C564523	0	0	0	0	0	0	2.47817	0
C564525	0	0	2.75172	0	0	0	0	0
C564539	0	0	12.2139	0	0	0	0	0
C564551	0	0	0	0	0	0	2.56728	0
C564555	0	0	4.19936	0	0	0	0	0
C564557	5.21491	7.42144	0	0	4.15448	7.61855	5.62635	6.52266
C564573	18.7011	16.2694	0	12.3678	12.5137	0	17.6356	0
C564587	0	0	0	2.66797	0	0	0	0
C564591	0	8.64456	0	0	0	0	5.91086	0
C564599	0	0	3.20774	0	0	0	0	0
C564621	0	0	0	0	4.25028	0	0	0
C564623	0	0	0	0	0	0	0	2.94516
C564643	0	3.09503	2.67156	3.31035	3.26756	0	0	0
C564645	2.96731	3.38598	0	2.51121	5.60927	0	0	0
C564651	20.685	0	31.1576	0	7.85969	6.77999	7.76195	0
C564677	9.03072	24.6665	11.0195	0	4.3908	0	8.49713	0
C564689	0	19.3122	9.846	5.60684	14.4898	23.492	6.1945	15.165
C564701	0	0	0	3.44157	0	0	4.9644	0
C564705	23.3766	26.1982	37.0152	22.7408	28.445	29.0485	28.5895	29.2319
C564717	0	0	0	0	0	0	4.05124	0
C564739	0	2.90622	0	0	0	0	0	0
C564743	0	0	0	0	0	0	9.8501	0
C564751	0	0	3.68595	0	0	0	0	0
C564761	0	0	0	0	0	0	3.84438	0
C564771	85.6194	93.2004	72.9748	101.75	121.554	109.842	105.005	74.0745
C564787	0	0	5.46432	0	7.53333	4.77495	0	0
C564791	7.30556	0	0	0	0	0	3.64689	0
C564793	0	0	0	2.87475	0	0	0	0
C564795	0	0	3.58068	0	0	0	0	0
C564807	0	0	4.16659	0	2.30439	0	2.97951	2.55619
C564813	0	3.27469	0	0	0	0	0	0
C564829	0	0	0	4.5618	0	0	0	0
C564831	6.56757	0	13.1165	6.35885	18.5314	8.14131	17.7686	4.9947
C564833	931.712	2149.63	624.648	1840.17	752.722	1539.56	2077.62	1535.64
C564849	3.2123	0	0	0	0	0	0	0
C564871	3.33154	0	0	0	3.56684	0	0	0
C564873	2.93418	0	0	0	0	0	0	0
C564875	0	4.13674	0	4.23539	5.28766	0	6.21253	0
C564877	0	0	8.92284	4.75147	3.60257	4.60171	0	3.02604
C564885	0	5.77369	0	0	3.83115	0	4.63217	0
C564887	0	0	0	0	0	5.5464	0	0
C564893	0	0	0	0	0	2.63201	0	0
C564913	0	0	2.73994	0	4.49768	0	0	0
C564919	0	12.8185	0	0	0	0	2.58891	0
C564929	0	0	0	0	0	0	4.05337	0
C564933	0	6.03633	0	0	0	0	0	0
C564939	0	0	2.83606	0	0	0	0	2.40278
C564955	0	5.96557	0	0	3.97701	0	5.73779	0
C564967	0	4.58835	0	0	0	0	0	0
C564969	0	0	0	0	0	0	2.49303	0
C564987	0	0	0	0	0	0	2.98917	0
C565029	0	0	0	0	0	0	0	2.49566
C565031	38.2882	32.662	18.8123	6.54214	28.3168	18.8428	20.6402	25.3226
C565035	0	4.36839	0	0	0	0	0	0
C565049	0	3.25903	0	0	0	0	0	0
C565057	0	11.1728	3.13717	0	2.79331	4.06234	3.07959	3.52906
C565071	0	0	0	0	0	2.6342	0	0
C565089	0	5.68988	0	0	0	0	0	6.52981
C565113	0	0	0	0	0	0	0	2.85053
C565117	29.2084	24.8879	43.7404	0	36.3264	42.3179	94.0541	43.189
C565131	0	5.51166	0	0	0	0	0	0
C565143	0	13.0293	0	0	0	0	0	0
C565145	0	0	3.26309	0	0	0	0	0
C565153	0	4.17818	0	0	0	0	0	0
C565155	0	0	0	0	0	0	3.41894	0
C565165	0	0	0	0	0	0	0	3.25834
C565171	0	0	3.60128	0	0	0	0	0
C565173	10.7014	30.3832	0	7.67511	12.6597	13.8423	14.3341	14.3016
C565175	42.9344	36.3866	42.3969	14.7185	22.3039	20.4122	28.3387	12.1032
C565197	0	13.7135	0	0	0	0	6.68183	0
C565199	0	0	0	0	0	0	0	3.64556
C565241	0	2.76398	0	0	0	0	0	0
C565247	0	6.99447	0	0	0	0	0	0
C565251	0	0	3.57612	0	0	0	0	0
C565253	6.32152	13.1109	6.45826	0	0	3.68404	0	4.57915
C565259	0	9.08753	0	0	0	0	0	0
C565281	0	2.78476	0	4.65428	0	10.2354	0	5.68943
C565291	0	0	0	0	0	0	3.80835	0
C565293	0	0	0	0	0	0	4.21181	0
C565295	0	0	0	0	3.01866	2.87597	0	0
C565305	0	0	0	0	0	0	2.91509	0
C565319	0	0	7.66192	4.16593	0	0	4.58858	3.20764
C565329	0	0	3.64934	4.57595	0	0	0	4.00116
C565353	0	0	0	0	0	0	3.39548	0
C565367	10.8697	0	5.11584	10.5551	10.3103	13.5643	17.3856	12.5832
C565385	0	0	0	0	0	0	3.03145	0
C565391	0	0	0	0	0	0	3.33013	0
C565395	0	4.08865	3.29268	0	0	0	0	4.44264
C565397	0	0	0	0	0	4.20249	0	0
C565399	0	2.99881	0	0	0	0	0	0
C565401	2.96038	0	3.28172	0	0	0	0	0
C565409	0	0	0	0	0	0	0	3.16406
C565415	7.96269	24.2502	0	0	0	0	4.08567	12.1335
C565423	5.28322	4.76819	4.44745	0	0	0	8.78478	0
C565433	0	0	0	0	0	0	0	3.03069
C565435	0	0	0	0	0	0	6.17295	4.22769
C565455	0	0	0	0	0	0	0	4.52376
C565457	0	0	0	0	3.78797	0	0	0
C565465	5.12483	5.85973	8.71271	4.52072	8.2992	7.22136	8.35766	0
C565485	2.89713	3.67019	0	0	0	4.6291	0	0
C565499	0	5.76911	0	0	0	0	1.83322	0
C565501	0	0	0	0	0	0	4.55826	0
C565511	0	0	0	0	4.63995	0	0	2.38398
C565515	0	4.88838	0	3.43366	5.76657	0	3.0205	2.91537
C565517	0	0	0	0	0	0	2.97391	0
C565537	0	0	3.42144	3.08027	1.62168	4.23911	4.11343	0
C565539	0	2.73495	0	0	0	0	0	0
C565555	0	0	2.97474	0	2.93163	0	0	0
C565569	3.82939	0	4.03877	0	0	0	0	0
C565575	0	2.65501	0	0	0	0	0	0
C565583	2.87784	0	0	0	3.56965	0	0	0
C565601	0	0	4.07978	0	0	0	2.67948	0
C565605	5.21753	17.5289	13.4052	0	5.92907	0	0	2.49862
C565613	0	0	2.78177	0	0	0	0	0
C565619	0	4.91597	0	3.07455	0	4.16323	3.32464	0
C565633	0	0	0	0	0	0	2.46515	0
C565643	0	0	0	0	0	3.33416	3.05692	0
C565653	0	0	0	0	0	0	0	3.62543
C565659	0	4.30159	0	0	0	0	0	0
C565663	0	0	0	0	0	0	2.90016	0
C565667	42.7894	55.1653	32.1902	63.7672	41.1645	72.8294	76.8796	62.2687
C565673	0	0	3.58089	0	0	0	0	0
C565675	0	0	0	0	0	4.35422	0	4.27033
C565679	0	0	0	0	0	12.5515	0	10.5086
C565681	0	0	0	0	0	0	0	4.09612
C565689	0	0	0	2.49168	2.86549	0	0	2.63677
C565697	0	8.37497	0	0	0	0	4.99392	0
C565709	0	0	0	0	0	0	3.34277	0
C565717	0	0	4.1223	0	0	0	0	0
C565723	0	0	5.4903	0	0	0	0	0
C565733	0	0	0	0	0	0	2.67123	0
C565735	0	4.13235	0	0	0	0	0	0
C565741	0	3.31449	0	0	4.40733	0	0	0
C565757	0	0	0	0	0	0	6.58857	0
C565759	0	0	0	0	0	0	3.38283	0
C565775	0	0	0	0	0	0	2.92757	0
C565779	0	0	0	0	0	3.84411	0	0
C565789	3.54048	0	0	0	0	0	0	0
C565819	0	0	4.29777	0	0	0	0	0
C565827	0	0	5.02299	0	0	0	0	0
C565845	0	0	0	0	0	0	0	2.86465
C565857	3.30511	0	0	0	0	0	0	0
C565863	0	14.2744	0	0	0	0	0	0
C565869	7.01784	20.5162	0	0	7.69064	8.82298	10.6604	7.34795
C565875	0	0	0	0	0	0	2.6015	0
C565881	0	0	3.31427	0	0	0	0	0
C565895	0	3.60573	0	0	0	0	0	0
C565901	0	0	3.57863	0	0	0	0	0
C565913	531.977	568.343	447.091	911.3	1058.14	1208.93	1567.33	1161.6
C565919	49.623	43.1962	55.2334	26.4417	60.7937	38.4602	41.7165	34.9613
C565925	0	0	0	0	0	0	3.93776	0
C565933	0	0	0	0	0	0	2.85379	0
C565949	0	0	0	0	0	4.26885	2.66393	0
C565959	0	0	0	15.221	0	3.29565	19.6348	6.80204
C565961	0	0	0	0	2.86098	2.89923	3.62995	4.09612
C565967	2.92126	0	0	0	0	0	0	0
C565969	3.41761	0	4.99118	0	0	2.88038	3.21631	0
C565975	0	3.57354	0	0	0	0	0	0
C566001	119.663	151.83	410.953	184.645	361.944	469.188	246.966	165.307
C566019	0	3.03032	0	0	0	0	0	2.75133
C566023	0	12.1061	0	0	0	0	17.3141	0
C566049	0	0	0	0	2.34189	0	0	1.81246
C566055	0	0	0	0	0	0	0	2.86875
C566059	0	0	0	0	0	0	0	2.46798
C566065	0	0	0	0	0	0	3.81476	0
C566069	0	0	0	0	3.64203	0	0	0
C566071	0	0	0	2.53825	0	0	0	0
C566085	0	4.08543	0	0	0	0	0	0
C566095	0	0	0	0	0	3.02082	0	0
C566101	0	0	0	0	0	0	2.49682	0
C566103	0	0	0	0	0	0	3.11507	0
C566105	0	0	0	0	0	2.59368	0	0
C566115	0	0	0	0	0	0	0	2.98608
C566121	0	3.85901	0	0	0	0	0	0
C566129	0	3.61493	0	0	0	0	0	0
C566131	0	0	3.4657	0	0	0	0	0
C566155	4.64611	0	0	0	0	0	0	0
C566159	0	0	0	0	0	0	3.39967	0
C566171	4.28242	0	4.54115	0	3.03611	2.55545	0	0
C566185	0	0	3.22451	0	0	2.51557	0	0
C566193	14.6634	10.8265	32.34	3.21352	36.7507	5.06887	0	0
C566197	80.3254	187.28	50.6002	47.8565	71.2298	75.045	59.6741	81.3625
C566201	0	3.49535	0	0	0	0	0	0
C566261	118.356	59.6274	81.5159	0	50.9514	9.40984	0	15.8051
C566285	0	0	0	0	0	0	0	3.29373
C566307	0	3.22172	0	0	0	0	0	0
C566327	0	0	0	0	0	0	10.2661	0
C566343	0	0	0	0	0	0	3.74745	0
C566359	0	0	0	0	0	2.45311	0	0
C566381	0	3.64001	0	0	3.09324	0	0	0
C566391	0	5.43173	0	0	0	0	0	3.02314
C566399	0	0	0	0	0	0	0	3.85445
C566403	0	0	0	2.40697	0	0	0	0
C566411	56.6081	37.1221	68.5934	36.5886	56.1372	51.2729	41.044	45.642
C566417	0	2.70992	0	0	0	0	0	0
C566425	0	0	0	0	0	0	2.65607	0
C566429	0	7.92574	0	5.58031	0	0	8.58654	2.65403
C566433	0	4.31585	0	0	0	0	0	0
C566437	0	0	3.28869	0	0	0	0	0
C566443	0	4.97781	0	0	0	0	3.31136	7.08425
C566445	0	0	0	0	0	0	3.58205	5.62369
C566475	5.50105	10.3161	5.31953	3.64285	7.95049	9.7003	5.23734	0
C566491	4.3298	0	0	0	0	0	0	0
C566501	0	0	0	0	0	0	2.59965	0
C566521	0	0	2.92697	0	0	0	0	0
C566525	0	0	3.05489	0	0	0	0	0
C566529	0	3.05988	0	0	0	0	0	0
C566531	0	0	9.00043	0	0	2.66399	0	0
C566543	0	0	2.62985	0	0	0	0	0
C566549	0	0	0	0	0	0	0	3.11752
C566553	0	0	0	0	0	0	0	2.83784
C566557	0	5.89442	0	0	0	0	2.38336	0
C566609	0	0	2.74805	0	0	0	0	0
C566613	0	0	0	0	3.11554	0	3.53591	2.9835
C566615	5.27229	0	6.27259	0	0	7.99944	0	0
C566621	0	2.7604	0	0	0	0	0	0
C566643	0	0	0	0	0	4.33182	0	0
C566645	0	0	0	0	0	0	0	2.78516
C566649	8.85829	83.7448	6.19988	31.5357	21.6235	39.8678	65.6854	59.5807
C566653	0	0	4.85378	0	3.66831	0	0	0
C566657	0	0	4.8721	0	0	0	0	0
C566687	2.846	0	0	0	0	0	0	0
C566701	0	0	2.68253	0	0	0	0	0
C566719	5.71386	0	0	0	0	0	4.79887	0
C566721	0	0	0	0	0	0	4.14572	0
C566723	0	0	0	0	0	0	2.80578	2.6093
C566729	0	0	3.549	0	0	0	0	0
C566755	0	0	0	0	0	0	2.96301	0
C566769	0	0	0	0	0	0	2.93575	0
C566805	0	2.6709	0	0	0	0	0	0
C566807	0	0	0	0	0	0	0	2.8955
C566809	0	0	3.71103	0	0	0	0	0
C566815	0	3.6449	0	0	0	0	0	0
C566817	0	0	0	3.04153	4.65264	0	0	0
C566823	0	5.84202	0	0	0	0	0	0
C566827	0	5.10923	0	0	0	0	3.49553	0
C566831	0	0	0	0	0	0	2.48799	0
C566843	0	0	0	0	0	0	3.29246	0
C566863	0	0	0	0	0	0	0	2.50963
C566877	0	0	5.92248	0	0	0	0	0
C566899	4.67108	40.8535	0	23.2195	0	8.20798	18.3569	28.9019
C566935	0	0	0	0	0	0	0	3.93362
C566953	15.0139	13.3025	23.3246	19.2737	29.9838	24.2492	31.577	0
C566987	0	0	0	0	0	0	0	5.01099
C566991	0	9.47502	4.14334	0	0	0	0	0
C566997	0	0	0	0	0	3.86787	0	0
C567007	0	0	0	0	0	2.57659	0	0
C567013	3.2452	0	0	0	0	0	0	0
C567023	0	0	0	0	3.28317	0	0	0
C567043	4.66733	0	0	0	0	0	0	0
C567049	0	0	0	0	0	0	2.90845	0
C567055	0	5.65192	3.54601	0	0	0	2.93652	0
C567063	0	4.82016	0	0	0	0	0	0
C567085	0	0	0	0	0	0	2.47325	0
C567091	0	0	2.71168	0	0	0	0	0
C567123	5.45137	4.90777	0	5.78225	6.86005	5.69932	6.4786	7.9527
C567127	0	0	0	0	0	0	0	2.33028
C567149	0	0	2.65484	0	0	0	0	0
C567153	0	0	0	2.99781	0	0	0	0
C567155	0	9.34498	0	0	0	2.88038	12.0538	0
C567167	0	0	0	0	0	0	2.52584	0
C567199	2.81718	0	0	3.14743	4.57194	0	0	0
C567213	2.86041	0	0	0	0	0	0	0
C567219	0	3.15036	0	0	0	0	0	0
C567225	0	0	0	0	0	0	2.51532	0
C567239	0	0	0	0	0	0	2.55526	0
C567241	0	0	0	0	0	0	0	2.39807
C567243	4.19605	11.5615	0	2.69337	6.26001	0	3.73317	4.16941
C567245	0	0	0	0	0	0	4.21484	0
C567261	0	4.03643	0	0	0	0	0	0
C567263	0	3.55105	0	0	0	0	0	0
C567267	0	0	0	0	0	0	3.30927	0
C567269	4.65057	0	2.87388	0	0	0	4.17793	6.40452
C567271	0	0	0	0	0	0	0	2.64797
C567275	0	0	0	4.85751	0	0	0	0
C567283	0	0	4.24356	2.48918	0	3.90454	0	0
C567285	0	4.77808	5.87281	3.92162	0	0	5.26253	0
C567309	0	0	0	0	3.8614	0	0	0
C567319	0	3.04991	0	0	0	0	0	0
C567359	0	0	0	0	0	0	3.38988	0
C567361	0	0	3.15678	0	0	0	0	0
C567365	0	0	4.00641	0	0	4.88101	0	0
C567371	6.05489	0	0	0	6.51546	0	0	0
C567381	0	0	0	0	0	0	5.03796	0
C567389	0	0	0	0	0	0	2.54687	0
C567399	0	0	0	0	0	0	2.90206	0
C567413	0	0	0	0	0	0	0	2.41002
C567423	0	4.06894	2.88317	0	0	0	0	0
C567433	0	4.08865	5.83156	0	3.29501	0	0	0
C567439	0	0	0	0	0	0	2.57016	0
C567467	2.78335	6.13441	5.71695	10.7778	16.8282	8.06451	6.6493	0
C567477	46.6296	5.43087	11.3947	5.18599	13.4012	6.41326	22.1695	10.428
C567491	0	0	4.01485	0	0	0	0	0
C567503	0	3.39139	3.07096	2.9817	0	0	4.50712	0
C567507	0	0	0	0	0	0	2.84649	0
C567539	0	19.6781	0	0	0	0	4.67074	5.23006
C567549	0	0	4.06893	0	0	0	0	0
C567557	0	0	0	3.29783	3.21018	0	14.0547	2.49889
C567565	4.02079	10.5595	0	2.84797	0	12.2275	9.34636	0
C567569	0	2.74835	8.20394	0	19.4278	0	0	0
C567577	2.79797	0	0	0	0	0	0	0
C567579	12.1877	43.3648	0	0	0	3.12581	16.7851	19.0742
C567583	0	5.52343	0	0	0	0	0	0
C567595	0	0	0	0	0	0	3.35543	0
C567607	0	0	3.50453	0	0	0	5.42259	2.44201
C567613	4.6974	4.84445	7.89165	8.26022	0	0	5.6918	10.0185
C567619	0	2.63428	0	0	0	0	0	0
C567631	2.94478	0	0	0	0	0	0	2.37335
C567655	0	0	0	0	0	0	2.53365	0
C567663	0	0	0	0	0	0	2.97816	0
C567671	0	3.54931	0	0	0	0	0	0
C567683	0	7.60064	0	0	0	0	0	0
C567693	0	0	0	0	0	0	0	3.38026
C567695	0	0	3.82267	0	0	0	0	3.34738
C567697	0	5.49316	0	0	0	0	0	0
C567709	0	0	0	0	0	2.68907	0	0
C567715	0	0	6.62577	0	0	0	0	0
C567723	0	0	0	0	0	0	2.49806	0
C567727	23.9233	11.9802	11.9228	13.3448	5.548	19.8402	14.8	9.57628
C567749	0	0	3.52259	0	0	0	0	0
C567753	0	0	0	0	0	0	2.53575	0
C567765	4.66848	0	0	0	0	0	2.50902	0
C567769	0	0	0	0	0	0	0	3.22795
C567777	2.86559	0	3.54745	0	5.45278	3.26226	0	0
C567781	0	5.73722	3.60604	0	0	0	0	0
C567787	0	0	0	0	0	0	0	4.79831
C567791	0	5.09877	0	0	3.76438	0	0	0
C567793	3.54154	4.27995	0	0	0	0	0	0
C567801	0	0	0	0	0	0	2.75206	0
C567807	0	0	0	2.94317	0	2.82722	0	3.5471
C567813	0	0	0	0	0	0	4.8882	2.84346
C567817	0	9.84993	0	0	0	0	0	3.63248
C567829	0	0	0	0	3.73151	0	0	0
C567835	0	0	2.74057	0	0	0	0	0
C567859	0	0	0	0	2.57665	2.95166	2.92757	0
C567861	0	0	0	0	4.73265	0	0	0
C567871	0	0	0	0	0	0	9.29369	0
C567873	0	2.26482	0	0	2.73467	0	1.65613	0
C567881	3.17284	0	7.05912	4.3686	0	0	0	3.96932
C567883	0	9.33926	0	0	0	0	0	0
C567897	0	0	0	0	0	0	0	3.21374
C567903	0	0	0	0	0	0	0	2.79906
C567909	0	0	0	0	0	2.94096	0	0
C567911	0	4.47852	0	0	0	0	0	0
C567925	114.018	189.533	98.0861	125.3	133.392	113.953	198.789	217.012
C567927	0	0	0	0	2.92889	0	0	3.37097
C567933	0	0	0	2.71705	0	0	0	0
C567935	0	9.52969	5.08253	0	4.11791	3.66122	3.44288	3.81615
C567945	0	3.61764	0	0	0	0	0	0
C567961	7.83968	4.34881	27.5383	5.00356	16.8948	7.11021	2.7954	5.30239
C567969	7.0601	7.08093	0	0	9.47528	0	0	4.41505
C567975	0	0	0	0	0	0	3.7148	0
C567977	0	0	0	0	0	0	2.68613	0
C567989	0	3.20276	0	0	0	0	0	0
C567993	0	0	0	0	2.83674	0	0	0
C568005	0	0	0	0	3.9812	0	0	0
C568013	0	0	3.02572	0	0	0	0	0
C568019	0	0	0	0	0	0	0	2.62552
C568033	0	0	0	0	0	0	3.51265	0
C568039	0	0	0	0	0	0	0	3.25846
C568043	0	0	0	0	0	0	0	2.8852
C568069	8.03876	19.7277	8.09893	4.09715	3.89546	6.2579	0	0
C568085	0	3.05557	0	0	0	0	0	0
C568091	6.81413	2.95126	7.5246	7.4858	7.03854	7.10799	6.01527	9.20354
C568095	0	0	0	0	0	0	5.1099	0
C568097	0	0	0	4.097	0	0	0	0
C568099	0	0	0	0	0	0	0	2.45077
C568107	0	2.69881	0	0	0	0	0	0
C568109	0	0	0	0	0	0	2.39516	0
C568111	0	0	3.28638	4.07974	3.53374	0	4.06309	0
C568117	0	0	0	0	0	0	3.37425	0
C568129	0	0	3.23344	0	0	0	2.65284	0
C568147	3.9753	0	0	0	5.72356	2.50953	5.36567	2.61554
C568159	0	0	0	0	0	0	0	4.02806
C568173	0	0	4.19426	0	0	0	5.60187	0
C568209	0	0	0	0	0	0	3.59452	2.87224
C568233	0	0	0	2.88742	0	0	0	0
C568239	0	6.19379	0	0	0	0	0	0
C568245	0	0	6.76289	0	0	0	0	0
C568247	0	10.2377	0	0	0	0	0	0
C568271	0	4.19666	0	0	0	0	0	0
C568273	0	0	0	0	0	3.03529	0	0
C568281	0	2.95703	5.71464	3.5965	3.48873	3.01867	5.31654	3.70511
C568289	0	2.95885	0	0	0	0	0	0
C568291	0	0	0	0	0	0	4.11398	0
C568297	3.73679	16.1378	0	0	0	0	2.02745	5.91906
C568305	0	0	0	0	0	0	0	5.07696
C568333	2.77362	0	0	0	0	0	0	0
C568335	0	0	0	0	0	0	3.31591	0
C568343	0	12.0649	3.4736	0	0	0	0	0
C568355	100.515	93.6196	95.1537	76.0845	86.6349	99.569	71.0643	61.5937
C568357	0	0	3.17456	0	0	0	0	0
C568359	5.76051	46.8039	0	0	0	0	5.5111	7.75484
C568365	6.77414	0	0	0	9.97914	0	0	0
C568373	0	0	0	0	0	0	2.90402	0
C568381	0	0	0	0	0	0	25.7788	17.9379
C568383	0	5.52806	0	4.77273	3.9739	0	0	0
C568385	0	0	3.07115	3.27798	6.86307	5.53287	3.81412	0
C568389	0	3.64959	0	0	0	0	0	0
C568419	0	0	0	0	0	0	3.73197	0
C568421	36.5012	0	61.1116	0	50.8892	42.8711	0	51.5992
C568425	0	0	3.57026	0	0	0	0	0
C568427	0	0	0	0	0	0	0	2.72406
C568435	0	0	0	0	0	0	2.51222	0
C568463	0	0	6.57975	0	0	0	0	0
C568473	0	0	0	0	0	0	4.16171	0
C568475	0	0	0	3.88097	7.88504	0	0	0
C568477	45.3295	75.2978	0	0	2.81246	19.0736	35.4859	70.8459
C568479	0	0	0	2.51708	0	0	0	0
C568499	3.88715	0	2.65656	0	0	0	0	0
C568501	0	0	0	0	0	0	0	2.39143
C568523	0	0	2.67909	0	0	3.80262	4.58519	0
C568537	0	0	0	2.75854	0	0	0	2.44201
C568539	7.17846	32.8095	0	0	0	10.6323	13.8905	14.8614
C568543	5.00857	0	0	0	7.47296	0	0	0
C568549	0	3.72636	0	0	0	0	0	0
C568583	0	5.85255	0	0	0	0	0	0
C568595	0	0	0	0	0	0	3.67995	0
C568603	0	0	0	0	0	2.56601	0	0
C568611	0	0	3.59501	0	0	0	0	0
C568613	0	0	4.46437	0	0	0	0	0
C568631	0	0	0	0	0	0	0	2.40422
C568649	0	0	0	0	0	0	2.8957	0
C568659	0	0	0	0	0	0	5.75117	0
C568663	0	0	0	0	0	7.56149	5.23027	0
C568665	0	4.72471	0	0	0	0	0	2.82335
C568687	0	0	0	0	0	0	3.3833	0
C568695	0	0	14.5743	0	12.3442	0	4.40031	0
C568707	0	0	0	0	0	0	0	2.83345
C568713	0	0	4.40368	0	3.11188	0	0	0
C568717	0	0	0	0	0	0	0	3.78244
C568735	0	0	0	0	10.0344	0	16.6524	0
C568739	5.21952	0	6.0397	0	0	0	0	0
C568741	0	3.59512	0	0	0	0	0	0
C568759	0	13.2587	0	0	0	2.76263	0	2.90249
C568763	0	10.3504	0	0	0	0	0	0
C568777	0	0	0	0	0	3.17673	0	0
C568785	0	0	3.08016	0	0	0	0	0
C568791	5.78199	13.0592	0	5.8051	0	0	0	0
C568799	0	0	0	0	0	0	0	2.55636
C568803	0	3.11626	0	0	0	0	0	0
C568813	0	2.73412	0	0	0	0	0	0
C568841	0	8.08319	0	0	0	0	0	0
C568869	0	4.52026	0	0	0	0	0	0
C568875	0	0	0	0	0	0	3.30969	0
C568899	2.83791	0	0	0	0	0	0	0
C568907	0	2.77681	0	0	0	0	0	0
C568917	0	0	0	0	0	4.38461	0	0
C568933	0	3.2528	0	0	0	0	0	0
C568945	0	0	0	0	0	0	7.72537	0
C568951	3.70904	0	0	2.46336	0	3.51579	4.81687	4.74132
C568957	0	0	0	0	2.80786	0	0	0
C568977	3.70114	3.28704	10.9509	11.7578	9.60517	7.44728	8.91315	3.13098
C568989	0	2.97288	0	0	0	0	0	0
C568991	0	0	0	0	0	0	3.3618	0
C568997	2.93437	0	0	0	0	0	0	0
C569003	0	0	0	0	0	0	0	2.79096
C569011	0	4.39773	0	0	0	0	3.11054	3.5784
C569023	19.5578	10.3088	19.9454	17.4082	19.6048	18.5	20.9663	16.1844
C569029	0	0	0	0	0	0	5.00997	0
C569041	0	36.3862	16.6814	0	21.1904	0	17.2499	0
C569045	0	2.66361	0	0	0	0	0	2.55506
C569067	3.40318	0	0	0	0	0	0	0
C569083	0	0	0	0	0	0	3.73242	0
C569087	0	0	0	0	2.8856	4.50908	4.04385	0
C569097	0	0	0	0	0	0	3.66819	0
C569103	0	0	3.03317	0	0	0	0	0
C569105	0	0	0	0	0	0	2.60398	0
C569107	0	0	0	0	3.18941	0	0	0
C569111	0	3.15255	6.15792	0	0	0	0	0
[truncated: 28,981 more rows]
